# Supplementary material for: Functional endogenous LINE-1 retrotransposons are expressed and mobilized in rat chloroleukemia cells
Source: PubMed Central journal article supplement — Nucleic Acids Res. 2007 Dec 10;36(2):648–65. doi: 10.1093/nar/gkm1045 (PMC2241872; doi:10.1093/nar/gkm1045), 2007-12-10

UID132 **TTATCCACTGCCTGCTGTAAGTCACAGCATGACTACACCTCCATCTCTCCACCTATTTCTCATGTTCTCCACATCAGAAGCTAGCAGAGAGGTTTACGTTTGCATGATTTTCTCAGTATGCTACCTCTCTTACTCAGGCATGTTCA** 150  
 UID711  
 UID26  
 UID44  
 UID341  
 UID125  
 UID308  
 L1-3  
 UID225  
 ruler 1.....10.....20.....30.....40.....50.....60.....70.....80.....90.....100.....110.....120.....130.....140.....150

UID132 **GGGGAAGAGAACTAAACCTCAGTATTATGTCTATGATCCACAAACAAGACTAAAATCAGCTACTACAGCCCTGCCATGATCTTGTCCTAAAATGTACTACTTTCAAAGACTTCAATACACAGTCCATCAGTCAGCCATTTTAAATAACGT** 300  
 UID711  
 UID26  
 UID44  
 UID341  
 UID125  
 UID308  
 L1-3  
 UID225  
 ruler .....160.....170.....180.....190.....200.....210.....220.....230.....240.....250.....260.....270.....280.....290.....300

UID132 **CCTGAGACCCACAAGGTGAACCCCAATTGTCAAGAAGACATGAGAAGACAGCCACTGTGGAATTAACCCCAAGGTTGCTCCACCCCACTCAACTTAAGATGTCCTTGCCATCCATTGGGGAGGGAACAAGCTATTGCAAGAAAAACAT** 450  
 UID711  
 UID26  
 UID44  
 UID341  
 UID125  
 UID308  
 L1-3  
 UID225  
 ruler .....310.....320.....330.....340.....350.....360.....370.....380.....390.....400.....410.....420.....430.....440.....450

UID132 **ACATGCCACATGGGGGAAGGTTACCTATCTCCTTCGGCTTGTCCCACTCTACTCTACACTAAAATGAAATCATGATTGATTGTGTAATTACTCACTACATGGTAGGCCACAAAATCACTCCCATGACTCTTTT-TTGTTCCTGTTGTTTG** 599  
 UID711  
 UID26  
 UID44  
 UID341  
 UID125  
 UID308  
 L1-3  
 UID225  
 ruler .....460.....470.....480.....490.....500.....510.....520.....530.....540.....550.....560.....570.....580.....590.....600  
 -AAAAGGCTCTCCCGGGGAATCAGTA-TCCCTGAACCTCAAGCAG 42  
 -ACTCACCTGGAAAACATCTGAGACTAAATTCAGTG-GCTTAGGCTCTCAAAAA 51  
 -CAGTAAGCCTCCAGATGACAAAT 23  
 -AATGAGGTATTGTAGATGTCCTGTTCCCTCACCTGAGCACCATAAGTCATTTATTG 55  
 -ATACTTGGGCATCAGAACTTTTCTTTGGAA 32  
 -AATGAGTGCCTTTTGTAGTCTGAGGAAATGGTTGGGACTCTGCAGAGGG 46



UID132 TCTATTTCTTAAAAGCACCTT-AAATTAAGAAATATAAATATCATAGAAAGTAAATTAGGAGTTCAAAAAT- GGATCTTTAAATATTACTTGGGT---TTTGCCATATTGAAATCATATCAAAAACCTTCTTCTT--TACAAAAAA 1314  
 UID711 ACAGGGAGACAAATAACCTTAT-AAAAAATGGAGTTCAGAG--GCTAAAACAAAG-AAATCACAGCTGAGGAAATGCCAAATGGCTGAGAAACCTTAAGAAATGTTCAACATCTTTAGTCAATAGGGAAAATGCAAAATC--AAAAACAACCC 741  
 UID26 AAAATGTACTTAAATACAGGCTT-TGTGGCCAGGCTTTGATACCAGCACTGGGGAGCCAAAAGTGCATGGATTAAACACACTGGTGAATTTACTCCAAGT--TACCAGTTGGAGTAATCACATTAAGGAAATCAATC--AAAAGTCAAT 763  
 UID44 CACTTCCAAACCCAGTACAAA-CAGGAAATATCTAAAGACCAAAGCCATCCAGATGGCTAAAAGCTCACGAAAGAACACAAATGAACAAAAACCTGGGCA--ATATGACACCTTTCAGA-GCACCAAGTATCCTACTAT--AGCAACCCCT 728  
 UID341 ATCTCTGAGCTAGC-TCAATAGG-AAATAGTCCACCTTCGGCACTGAGATTTTCATTTCAATCCCTTAGGACAAACAAAGCTTATTTTATATGTTATGTT--TATTTGAGTGTAGTATACACACCACTTACCAGATTTCTTCTTAGCCT 746  
 UID125 GCTAAATCCCAACCCCTCAGAT-CATTTTTTTCTCATACTTCCCTACACAATTTCTGTTATACCAGTGGGCTCCAGAGATTAACCTCAGAT---AGGCATTCGTGGTGGCAAGTATCTTTACCAGTTGTGCTTCT--TGCCTGGTCCCT 736  
 UID308 GAAAGAACTCCAAGTCAACACA-CAGGAGTTC--CATTAGATGTTCTAGAGGAAT-GGGTAAAGAAATGTGTACATAAAAGAAATGTGTGTGTGTGT-GTGT---GTGTGTGTGTGTGTGTGCACCGCTGCCGCGCCAC--ATACAAACAC 702  
 L1-3  
 UID225 AAGATAATGACAGAGGGCTCAAGTGTGGAGAGTGGTTCCTGGCAACCAACATCAAAATGACAGGACCTTCACTCCACAGCAGCAAGGAGCTAAGTCTGGAT---GACCTCAGGAGACTTGGGAGCTAGTCTTCC-----TCCCTG 762  
 ruler .....1210.....1220.....1230.....1240.....1250.....1260.....1270.....1280.....1290.....1300.....1310.....1320.....1330.....1340.....1350

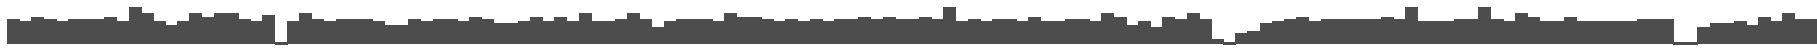

UID132 AAAATTTTTCATAAGC-AAATTTTATGATT-TTGTGTTCTAAA-ABATTAATTGCAA-CTATGTTTTG--CTTGATATAAAGCTGATTTTGCATTTAATCTACTGTTTTGTTTATTCTGGTTTCATTAAGGCCCTATTTTAAAAATAA 1458  
 UID711 TGAGATTTCCACCTCT-CACCAGGGAGAAATGGCTAAGATCAAAA-ACTCAGGTGACAG-CAAAATGGTGG--TGAGGATGTGGA-GAAAGAGGAAACACTCCTCCATTTGTTGGGATTGCAGACT--GGTAGAGCC--ATTTCTGGAAAT-- 879  
 UID26 GAAAAATCAGTTAAATGAAAGAAAATCAAAAGTTTCCCTTGGAGTCACTAAGAGAAAATCTAGATTTTAACTGTTTACTTTTGTGATACCTGTGCCCTATGTTTTCT-TTCTGTCTGTTATGAGTCTGAATCTGTGCCCTGAAGAAATG- 911  
 UID44 GGATATCCTAACACA--ACCAAAGAAACAGGAAATGACCTTAAATCCAACTTGTAAAGATGATAGAGGCCCTCAAAGAGGAAATGATAAAATCCTTTAAGGAAA-TACAGGAAAATACAAATAAAAAAAGGTGGAGGTCTTAAAGAGG 875  
 UID341 TTATATTTTATTCAGTTATTTCTAAATAAGATTACAGTTTCAATTAATTAACATTTGTTCACTTAGTTT--CTAGATGGAAAATCACCAGCATGCAGTGGTCCAGTGGTGAAGCAAAGAGTTAAGACAAGAACATTTCTTCTCATT- 893  
 UID125 GTATCTTTTGTATATGATGTTGCTG-TAAAATTAATAAAAAAATAAAATGCTGTCTTTTACCTTG--CATTAGATCCAACCCATAGTGCCTTAAGATATCT--GGTAGATATCTTCACTCAGTCAGCAAAGCGTCTCAGCTGCT- 880  
 UID308 AAAAGTAAAGTCAAAGTATCTAGGAAAACAAAAGGAATAAATAAGAGGGGCAGAAAAGGAGGGGGAG---GAAAGGATATGCCAAGGTACTATACTGCACGAAAAATAAAAAATCAAGAAAGAAAGAGGTTGAGTGGAGAAATGA 848  
 L1-3  
 UID225 ATTTCTGCTGTGTGAGACCCCTGGAGACCCAGCTAAGCTGTCCCAGGATGGGGTCTGACCTATGGGCATCTATGATAAATAAATAGGGGCTGGACTGGAAGAGCTCAGTCGGTAGGAGTACTTACTGCCCTTGTAGAAGACCTTGTAGACCT 912  
 ruler .....1360.....1370.....1380.....1390.....1400.....1410.....1420.....1430.....1440.....1450.....1460.....1470.....1480.....1490.....1500

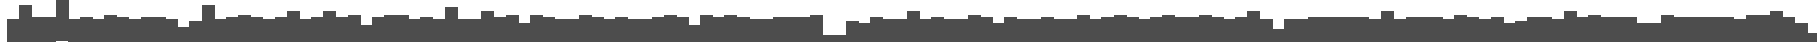

UID132 TAAAAACCACAGGATGCTTTTACACTGAAACTTTAGG-ATCTTCA-ACATGAAGACTATGTATATAAACATTTGTTTGTGTGCTTAAAAAGGGG--AACCAA-TGGGCTGAAATGATCAAAAATAATTATGTATCATGAAATTTCTC 1603  
 UID711 --CAGTCTGGAGGTTCCCTCAGAAAATGGACATTTGAACACTCTTGA-GGACCCCAAGCTATGCTCTC-----TTGGGCATATACCCAAAAT-GATG--CCCCAA-C-----ATATAACAGAGACACATGGTCCAGTATGT---TCATA 1005  
 UID26 -CTCATTTGAACTTTCTCTCACACTTACGTCTGACTTGTGA-CTGTCT--CTATATGTC-----TGTCTGTCCCTATCGAG-GGTT--CCCTAC-TGAACAGTACAGAAGCATCAAGGTAAGGAGTGGTACTTCCA 1043  
 UID44 --AAAGAAATAAATCCCTTAAAGATATAAGGAGAAAGACAATTAACAGGTGAAGGAAATGAATAAAATGCAATACTGAGAGTGGAAACAGAAG--CAATAA-AGAG-AACACA-AACTGAGGCAATCCCTGGTGAAGGAAAACCTAGGG 1019  
 UID341 --CAAGTGAATGCTTCTCAACCCAAATGGAAAAAATAGTTTGAAGACCCAAATCCCATGGGGGAGA--GAGCTGAATCCCGAAGTGTG--GACAAAT-CC-----TGAGAGCTCAGAGGAGATGGCCACTTCTGCCACTGCT 1027  
 UID125 -----TTGCTCTAATCCATATCACACTGCGGATGGCTTCTTCTGAGCCTGGTAAACAGTCTCTCTAC-----CTGTCTACTTCCCAAGGTAGGTTGCCACCATGCCAGACATACATCCCAATTTCTGTGGCGGGCTAAGTGTCTAGCC 1020  
 UID308 --AAAGTAAATACACAGGCTTACAAAAAATAAAATCCTTAAGAGAAATCGCAGATATATTTATTA-----TTGTTCTGATGGTTTCATAGCTA-TGTCCATGTG-----TCACACTTAGCAAGTCATACAAATATATTTATTTTTC 984  
 L1-3  
 UID225 -----TTGCGGAGGCTCAGCTCCCTCCCTCCAGTGGTGGCTCACAAATGTCTGGAACTCCAACCTC-----CACATGGAGTCTAGATAAAGACTTCTTAGGTT-----TAAAAAGTTATGACAAA--ATATTTTAAAGTTTCTCT 1041  
 ruler .....1510.....1520.....1530.....1540.....1550.....1560.....1570.....1580.....1590.....1600.....1610.....1620.....1630.....1640.....1650

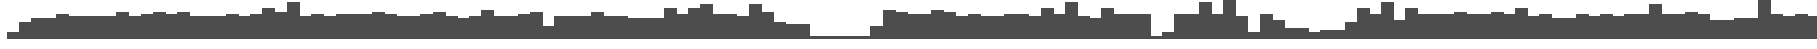

UID132 AAAACCTTAAATTAACCTC--ATACTTTTAAA--AATGATAGTA-GAACTACTTA---GGTGTCAATGCTGTTATGGGA--GTTTC--CTTTATACAGTATAGGAGAAAATATTTGG-TGAGTGTGTGCTTTTGGAAATAAATG 1740  
 UID711 GCAGCCTTATATATAATAG--CCAGAAGCTGGA--AAGAACCCAG-ATGCCCTTCA--ACAGAGGAAATGGATACAGAAAAAT-GTGGTA--CATCTACACAATGGACTACTTACTAGCTATCA-AAAACAATGACTTTATGAAATTCATA 1143  
 UID26 GAAACGTTTAAATGAAGTTTACTCAAGATTAATCATTGGTTCTA-ACTGACCCCA---ACTGACCCAGAAAAACAGCAAAAT-GCCAT---TATTTAT-CAAC-CAGTACATACATGTTGTGT-TCAAATTTACAGTGGATGTTCAATT 1182  
 UID44 AAGAGAACAGGAGCAACAGACAAAAATCATCACCACAGAATACAG-GATGGAAGAG--AGAAACTCAGGAAATAGAAGATACCACTGAAGAAATGATACACAGTCAAAGAAAACGTTGAACTAAAATAATCCCTGACACAAAGCAATCC 1165  
 UID341 CTCACATCTACTTCTGCCAAGAGGAACTGTATAGTGGTCTCTG-GATACAGGAAATATAGGAGCAGTCAGTGGCAGGAACTGTGGTT-CTGCTTGTGGCAAAAAATTAACCTGCTCCACAGTCTCCCTGACCCAAATCCCTG 1175  
 UID125 ACCACACTCTTAAATTAAGTCAACCAATGAAAGAACACACAGAAATAACCTCTGATCCAATGATAATAAATTCGCTCATCTAGACATCAAAAGCCCTGTACACATCCATCCCTTAAGAAATTTAATAACAACCTATAAATG 1170  
 UID308 GTATCCCAAGTTTGGCTT---CAAAAATGTGATAAATCTCCAACTTACCCTCC---AGGGTCTGGGATGAGGTAAGAGGTAAGAGCCCAAAATTTGGTTAAACCATATCATTTACATATAGGTTACCAGAAATCAAAAAGCAATTTAGGA 1127  
 L1-3  
 UID225 CATGTTGCTAATTTCTCTTCCCTGATGTTGCCCTGGAACAGCCTAATGTGACATACCC---GGAAAAAGATGCTAGGGGAAAAAATAAATCCAAAGACGATTTATATTTTCTTATACCTTGTAGGATCTTTTAGGGCAAGGCTATTTCT 1188  
 ruler .....1660.....1670.....1680.....1690.....1700.....1710.....1720.....1730.....1740.....1750.....1760.....1770.....1780.....1790.....1800

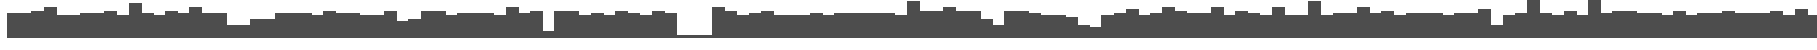

UID132 -AAACATTCGTTTCACTTAA--TGTAATTTGGGCTCAGAAACTACTTTTAAAAATACAATCAAGTCTCTGCTCCCAGACCCGGTGAGAGAGAGAC-CCAACCGCCTGGTCAGGTGGGCACTCC-TGAGGCTGCAGAGCGGAAGAG 1885  
 UID711 -GGCAAAITGGATGGAACGGAAA--TATCACTCTGACCCGGGATCCC-----GGCCCGCAG-CAGCTCTCTGCTCCCAGACCCGGTGAGAGAGAGAC-CCAACTGCCTGGTCAGGTGGGCACTCC-TGAGGCTGCAGAGAGGAAGAG 1282  
 UID26 TAGAAGACTGCTTTCACACTCTG--TATTCACCTGCATTTCAGCAAT-----GAGACATATGCAATTTTCTG-----AGTCAGGGGCAATGGAAGAC-CATGTAAAT----TTAAGATTACATCTA-TGTATTAACTTAGTTTTAAAA 1309  
 UID44 AGAAAAATCCAGAGTAAGATGAAAAAGCCAAACAAGAAATAGCAGGAATAG--GGCTGGGGTTTAGCTCACTGGTA--GAGCCCTTGCCTAGGAAGAG-CAAGCCCTGGGTTCGTTCCCGCAGCTC-CGGAAAAAAGAAAAA 1308  
 UID31 TGGGGAGAGAGCTGGACCTCAGAAGTGCAGACAATCTCTGAGAACTCAG---AGGAGACAA-TAACCTTCTGCCACATTCCTGACCCAAAAGGAAA-CCACCTAGAGCCATCAGTGCCTCTGGGCACAGTGACCTAGGAGCAGTC 1318  
 UID125 TGCAGAGAGGAACTTAACTCCGCCCCAATGTTCTCTCCACTGGTTATCCC--CTCTCCAGTCTCCTCCCTCCCTAAAACTTTTCTCTTCCGCCCATC-CTTCTCTCTCGTCCAAATGACAGGCCCTCGTTCTAATTTGTACCTGCCTTC 1317  
 UID308 AAACTTTTTGGACAAACCAAAACAACCTTACAAGAATTTCCACATTGTAACT--TTTTCTTAGGATCCTCAGCATTATATTTACACTGCACTCAAAGTCACTTTGTACTGTGATTAATAAAACGCTTGTAAAGCTGTGAGGTCCTAGAC 1274  
 L1-3 -----  
 UID225 TTAGTTTAACTGTTGGCACTCACGAAAATATCTCTCAACTGTAGG-----ATAG-CACCTCTCCTCTGCAATGTGTTGAGGGGAAAAAGAACTCTGAGCTTAGTTAAGAGGATGAGCATCCGTAGTA--AAATATTAGTT 1319  
 ruler .....1810.....1820.....1830.....1840.....1850.....1860.....1870.....1880.....1890.....1900.....1910.....1920.....1930.....1940.....1950

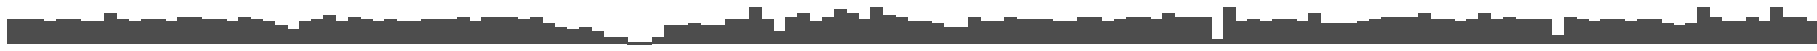

UID132 ACCACCAACTGCT--CACCCCTGCCACA-ACCTGGGCC--AAGAGGAACTGTATAAGGCCCTCTGGGCTCCCCTGGGG--AGGCCAGGAGCGGCAGGACTTCTGCGCTGAGACCCGAGAACCTGAAAGAAACAGACCA 2027  
 UID711 ACCACCAACTGCT--CACCCCTGCCACA-TCCTGGGCC--AAGAGGAACTGTATAAGGCCCTCTGGGCTCCCCTGGGG--AGGCCAGGAGCGGCAGGACTTCTGCGCTGAGACCCAGGAACTGAAAGAAACAGACCG 1424  
 UID26 GTTGGTTACGTGGGA--AATCCAAA--GCA-AATGAGTT-----GGTTGCCATGTTGTTCTCTACAGTCAATGTTAAAC--AAG--AGGCACATAAGCATAATCGTCTGA-AGACTTACGCAGCTCAAGGG--G 1430  
 UID44 AA-AAATACAGGAA--AGAAATAGGTGAAG-AGTCTGGGCT--ACAAGG--CCAGAAAATATTCAA-----TCAATTAAG--AAGA--AACTTTCTAATCAAAATAAGAAATGCCTATAAACATTCAGGAAG-----CT 1432  
 UID31 ACGGCAAGACCCCTTGGGTTTGGCCCTACC-CCCATAGCT--GAAAGCCACTCAAGAACAACCTACACACCCGAGAGCA-GAGGC--AAGACCACTCTCTGTCGCAACCAACCCACTG-GAAACTTCAAGTAAAACAAAC 1458  
 UID125 CCTGCATAATGACAT-CATCCTA--CATA-TGTATAGTCA--ATTAAACAGGTACTTCTGTATCTAAAAATGGCTTTGAAATA--GGAAT--GTGCAGTTGAGCCAGGGAGATCCAGAAGTA--GGATGCTGAGACT--G 1442  
 UID308 TCTCTTATTATATCTGAGACCCAGAAAGTGGAGTCTCTTACAGAAAATATGTGTTCAATTCACTGAACTTACGTTAATTTTAAAAATAATTAATCTATGATAGCACAATGTTGGGGTGGCCCTGGAGGCCATGGAGGGCGGAGATG 1424  
 L1-3 -----  
 UID225 ACTGCCATTACTCCTGCAACAGCCAATGCCAGCCATTGCT--GTGGGAAGTGAATAACAATCCTTTTAAATTCATTAAGC--AAATAT--TGATGTTTAACTTTTCTAGGGGAAAGTCT--AAATTT--G 1441  
 ruler .....1960.....1970.....1980.....1990.....2000.....2010.....2020.....2030.....2040.....2050.....2060.....2070.....2080.....2090.....2100

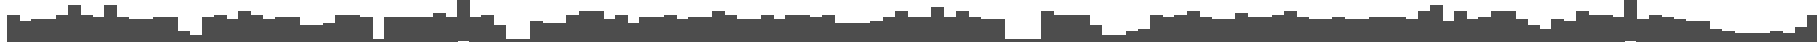

UID132 GATAAACAGTCTCTGCAACCAAAATCCCGTGGGAGGGAGAGCTAAACCTTCAGAGAGGCAGACAAGCCTGGGAAAACAGAAAGAGACTGCTCCCTGCACACATCTCGGACGCCAGAGG-AAAAAGCCAAAGACCTTGGAAACCTGGT 2176  
 UID711 GATAAACAGTCTCTGCAACCAAAATCCCGTGGGAGGGAGAGCTAAACCTTCAGAGAGGCAGACAAGCCTGGGAAAACAGAAAGAGACTGCTCCCTGCACACATCTCGGACGCCAGAGG-AAAAAGCCAAAGACCTTGGAAACCTGGT 1573  
 UID26 TATTAATAACTCTA-GCTGTGAGAACCAGTGAAGTT---CGACTCTTAGAAAGTAACTATATTATAAATATGGATCACCACGAGAG-GTACTCAGAGGTTACAGGGCCAGTCA-GGGCTAATAACAGAGACTCTGGCCAAAAT 1573  
 UID44 GATGA--AACACCAATTAGACTGGACCAAGAAAAGAAA-----ATCCTCCTGCACATAAATAAATAAACAACAAAATACAGAAACAAATAAAGAAATATAAAGCAGCAAGGGGAAAAG-GCCACGTAACATACCTATCAGAAATACACC 1573  
 UID31 CAGGAGAAGCTCTCCGTTCCAGATCCAGCTGAAAGA--AAACAGGTCTACAGGAGTGTCTGACACACAGGCCACAGGAGGTTCAAGTCACTGTCAGAGACAGCAAAACAAGCTA-ACACCAGACACAAATGTGATGATG-AGAGGC 1600  
 UID125 TCTGA--CCTCCTTGCCTAGATTCCCTCTCAGCTT---CTAAAAACAGTGAATC---TCTATCCCAATGCTCTCCTTAGCCCCCTTCCGTAGGTTGTGTGTGTGCTGGT-GTTG-AGGTGGTGAATAAAGCTTTATGTCGCTTT 1579  
 UID308 CCTTGG-AGCTGGACTTAGAATGGTGTCTGTGAGCTACTTACTACGGGTCTGAGAGCTACTCTGAGTCACTAGAGGACCATCTACGCCCTCTCATGTAATGAGGCTCATGGTAATGCTAGGACGAAAAACAACCCAGAGCACACA 1573  
 L1-3 -----  
 UID225 TCTGGTTTACATCATACATTTGATTTGTTTAGGAATG--TATTATATTTTATTTGTTGGAATGTTAACTTTTGTATTGAAGGAACTGCACTGTTCACTCAAA-----AGGAAGTTGACTTCTCTTAAAATAAAGAT 1573  
 ruler .....2110.....2120.....2130.....2140.....2150.....2160.....2170.....2180.....2190.....2200.....2210.....2220.....2230.....2240.....2250

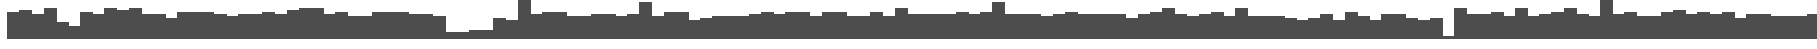

UID132 GCACTGAAGCTCCCAGGAGGGGGCGGCACAGGTCTCCCTGGTTGCTGCCGCTGCAGAGAGCCCCGGGCAGCACCCCAGAGCGAACTGAGCCCTGGGACCCAGGT---AAGACCAAACTTTCTGCTGCAAGAAAGCTGCCCTGGT 2322  
 UID711 GCACTGAAGCTCCCAGGAGGGGGCGGCACAGGTCTCCCTGGTTGCTGCCGCTGCAGAGAGCCCCGGGCAGCACCCCAGAGCGAACTGAGCCCTGGGACCCAGGT---AAGACCAAACTTTCTGCTGCAAGAAAGCTGCCCTGGT 1719  
 UID26 AAAAAAGTGAACATTTTGGCGGGCACAGGTCTCCCTGGTTGCTGCCGCTGCAGAGAGCCCCGGGCAGCACCCCAGAGCGAACTGAGCCCTGGGACCCAGGT---AAGACCAAAATTTCTGCTGCAAGAAAGCTGCCCTGGT 1719  
 UID44 AAACCTTAAAAGCTAAAAGGACAGATGTCGTGCAACCTCTTAAAAAAGAAAAAAGAAAAAGCCGCTGGGCAGCACCCCAGAGCGAACTGAGCCCTGGGACCCAGGT---AAGACCAAACTTTCTGCTGCAAGAAAGCTGCCCTGGT 1719  
 UID31 AAGCAGGAAATCAAGACTACTTGGCATTCTCAGAGCCAGTCTCTCACCAAAAGAAA--TACTGGAATATC-----CGAACACACTGAAAAGCAAGATTTGGGATG--AAAAACAGATCTTATGATGATGATAGAGGACTTTAAGAA 1740  
 UID125 CCTTTAAGGTTGGTAAATGAGAGGACACAGGGAACCGCTGGTAAAATGAGTTACTCTTCTGGGCTCATTTTTTCACTTAAATGAGTGAAT-AAAA--GTTTTTCTCCCTCTCGCTTACCATCCACCCAGGTA 1724  
 UID308 GTTGTGACTTCCAGCTTGGAGTAAGTGTCTGACGAGGATCATGAAGGAATCAAGGAGTGAACCTGAGC--CAGTCTACAAGCTTCTCAGGACAACTCTGGTACGCAGA--GAGAAAGAAATGAAAAGAACTGATAGAGTAGATCTTCAA 1718  
 L1-3 -----  
 UID225 ACHGCT-CATTTTCGATTTGAACTGGTCTCTATGGTTGTGTATAACAGGCTGAGTATTCATTTATCTGAAGGGC--TTCACAAATAGAAATTCAGAGTTTGAATCTTTGTTTTTGGAGACAGGGTTTTTCTGTGTGCTTGGCTGCTAGAA 1720  
 ruler .....2260.....2270.....2280.....2290.....2300.....2310.....2320.....2330.....2340.....2350.....2360.....2370.....2380.....2390.....2400

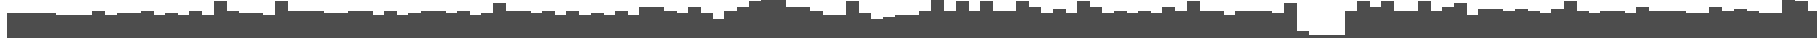

UID132 CTTGGGACACGGAAGCAGAAATTTCTCTAGGA--GGCACGGTCTGTGTTTACCGGAAGTCCCACACCCCGGATCCCGGCCCGCAGCAGCTCTGCTCCCAGACCCGGTGAGAGAGAGACCCAAACCGCCTGGTCAGGTGGGCACTCCTG 2469  
 UID711 CTTGGGACACGGAAGCAGAAATTTCTCTAGGA--GGCACGGTCTGTGTTTACCGGAAGTCCCACACCCCGGATCCCGGCCCGCAGCAGCTCTGCTCCCAGACCCGGTGAGAGAGAGACCCAAACCGCCTGGTCAGGTGGGCACTCCTG 1866  
 UID26 CTTGGGACACGGAAGCAGAAATTTCTCTAGGA--GGCACGGTCTGTGTTTACCGGAAGTCCCACACCCCGGATCCCGGCCCGCAGCAGCTCTGCTCCCAGACCCGGTGAGAGAGAGACCCAAACCGCCTGGTCAGGTGGGCACTCCTG 1866  
 UID44 CTTGGGACACGGAAGCAGAAATTTCTCTAGGA--GGCACGGTCTGTGTTTACCGGAAGTCCCACACCCCGGATCCCGGCCCGCAGCAGCTCTGCTCCCAGACCCGGTGAGAGAGAGACCCAAACCGCCTGGTCAGGTGGGCACTCCTG 1866  
 UID341 ---GGACATATAA---ACTCCCTTAAAGA---AATAACAGGATA---CCCAACCCCGGATCCCGGCCCGCAGCAGCTCTGCTCCCAGACCCGGTGAGAGAGAGACCCAAACCGCCTGGTCAGGTGGGCACTCCTG 1866  
 UID125 GTGGAAAAGAAAGTTAAACAGGGCAATAGGA--GGACCTGCGTAGAAAATAGTT---CTTTGGACCCCGGATCCCGGCCCGCAGCAGCTAICTGCTCCCAGACCCGGTGAGAGAGAGACCCAAACCGCCTGGTCAGGTGGGCACTCCTG 1866  
 UID308 AT--GAACCTCAGAAAATTAGACAACCAACAATCCAGGACAACCTCAAAACTGTAGAAAACAGACAGATCAAAACCAACCAATCCGGCAGCAGCTCTGCTCCCAGACCCGGTGAGAGAGAGACCCAAACCGCCTGGTCAGGTGGGCACTCCTG 1866  
 L1-3  
 UID225 CT--GACTCTATAAAACAGGCTGGCCCTCAAACCTTACAGCGATCTGTAGCCCTCCTAAATGCTGAGATTAAAGTTATAATGCCG--AGCAGCTCTCTGCTCCCAGACCCGGTGAGAGAGAGACCCAAACCGCCTGGTCAGGTGGGCACTCCTG 1866  
 ruler .....2410.....2420.....2430.....2440.....2450.....2460.....2470.....2480.....2490.....2500.....2510.....2520.....2530.....2540.....2550

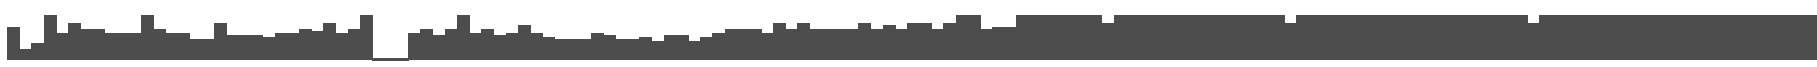

\*\*\*\*\*  
 UID132 AGGCTGCAGAGCGGAAGAGACCACCAACACTGCTCACCCCTGCCACATCCCTGGCCCAAGAGGAAACTGTATAAGGCCTCTGGCTCCCGTGGGGGAGGGCCAGGAGCGGCAGGACTTCTGCGCCTGAGACACCGCCAGAACCTGAAA 2619  
 UID711 AGGCTGCAGAGCGGAAGAGACCACCAACACTGCTCACCCCTGCCACATCCCTGGCCCAAGAGGAAACTGTATAAGGCCTCTGGCTCCCGTGGGGGAGGGCCAGGAGCGGCAGGACTTCTGCGCCTGAGACACCGCCGGAACTGAAA 2016  
 UID26 AGGCTGCAGAGCGGAAGAGACCACCAACACTGCTCACCCCTGCCACATCCCTGGCCCAAGAGGAAACTGTATAAGGCCTCTGGCTCCCGTGGGGGAGGGCCAGGAGCGGCAGGACTTCTGCGCCTGAGACACCGCCGGAACTGAAA 2016  
 UID44 AGGCTGCAGAGCGGAAGAGACCACCAACACTGCTCACCCCTGCCACATCCCTGGCCCAAGAGGAAACTGTATAAGGCCTCTGGCTCCCGTGGGGGAGGGCCAGGAGCGGCAGGACTTCTGCGCCTGAGACACCGCCGGAACTGAAA 2016  
 UID341 AGGCTGCAGAGCGGAAGAGACCACCAACACTGCTCACCCCTGCCACATCCCTGGCCCAAGAGGAAACTGTATAAGGCCTCTGGCTCCCGTGGGGGAGGGCCAGGAGCGGCAGGACTTCTGCGCCTGAGACACCGCCGGAACTGAAA 2016  
 UID125 AGGCTGCAGAGCGGAAGAGACCACCAACACTGCTCACCCCTGCCACATCCCTGGCCCAAGAGGAAACTGTATAAGGCCTCTGGCTCCCGTGGGGGAGGGCCAGGAGCGGCAGGACTTCTGCGCCTGAGACACCGCCGGAACTGAAA 2016  
 UID308 AGGCTGCAGAGCGGAAGAGACCACCAACACTGCTCACCCCTGCCACATCCCTGGCCCAAGAGGAAACTGTATAAGGCCTCTGGCTCCCGTGGGGGAGGGCCAGGAGCGGCAGGACTTCTGCGCCTGAGACACCGCCGGAACTGAAA 2016  
 L1-3  
 UID225 AGGCTGCAGAGCGGAAGAGACCACCAACACTGCTCACCCCTGCCACATCCCTGGCCCAAGAGGAAACTGTATAAGGCCTCTGGCTCCCGTGGGGGAGGGCCAGGAGCGGCAGGACTTCTGCGCCTGAGACACCGCCGGAACTGAAA 2016  
 ruler .....2560.....2570.....2580.....2590.....2600.....2610.....2620.....2630.....2640.....2650.....2660.....2670.....2680.....2690.....2700

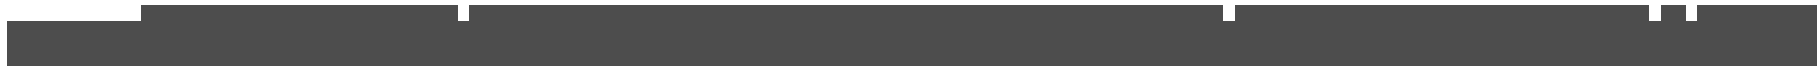

\*\*\*\*\*  
 UID132 GAAACAGACCAGATAAACAGTTCTCTGCACCCAAAATCCCGTGGGAGGGAGAGCTAAACCTTCAGAGAGGCAGACAAGCCTGGGAAACAGAAAGAGACTGCTCCCTGCACACACATCTCGGACGCCAGGAAAAAGCCAAAGACCATCTG 2769  
 UID711 GAAACAGACCAGATAAACAGTTCTCTGCACCCAAAATCCCGTGGGAGGGAGAGCTAAACCTTCAGAGAGGCAGACAAGCCTGGGAAACAGAAAGAGACTGCTCCCTGCACACACATCTCGGACGCCAGGAAAAAGCCAAAGACCATCTG 2166  
 UID26 GAAACAGACCAGATAAACAGTTCTCTGCACCCAAAATCCCGTGGGAGGGAGAGCTAAACCTTCAGAGAGGCAGACAAGCCTGGGAAACAGAAAGAGACTGCTCCCTGCACACACATCTCGGACGCCAGGAAAAAGCCAAAGACCATCTG 2166  
 UID44 GAAACAGACCAGATAAACAGTTCTCTGCACCCAAAATCCCGTGGGAGGGAGAGCTAAACCTTCAGAGAGGCAGACAAGCCTGGGAAACAGAAAGAGACTGCTCCCTGCACACACATCTCGGACGCCAGGAAAAAGCCAAAGACCATCTG 2166  
 UID341 GAAACAGACCAGATAAACAGTTCTCTGCACCCAAAATCCCGTGGGAGGGAGAGCTAAACCTTCAGAGAGGCAGACAAGCCTGGGAAACAGAAAGAGACTGCTCCCTGCACACACATCTCGGACGCCAGGAAAAAGCCAAAGACCATCTG 2166  
 UID125 GAAACAGACCAGATAAACAGTTCTCTGCACCCAAAATCCCGTGGGAGGGAGAGCTAAACCTTCAGAGAGGCAGACAAGCCTGGGAAACAGAAAGAGACTGCTCCCTGCACACACATCTCGGACGCCAGGAAAAAGCCAAAGACCATCTG 2166  
 UID308 GAAACAGACCAGATAAACAGTTCTCTGCACCCAAAATCCCGTGGGAGGGAGAGCTAAACCTTCAGAGAGGCAGACAAGCCTGGGAAACAGAAAGAGACTGCTCCCTGCACACACATCTCGGACGCCAGGAAAAAGCCAAAGACCATCTG 2166  
 L1-3  
 UID225 GAAACAGACCAGATAAACAGTTCTCTGCACCCAAAATCCCGTGGGAGGGAGAGCTAAACCTTCAGAGAGGCAGACAAGCCTGGGAAACAGAAAGAGACTGCTCCCTGCACACACATCTCGGACGCCAGGAAAAAGCCAAAGACCATCTG 2166  
 ruler .....2710.....2720.....2730.....2740.....2750.....2760.....2770.....2780.....2790.....2800.....2810.....2820.....2830.....2840.....2850

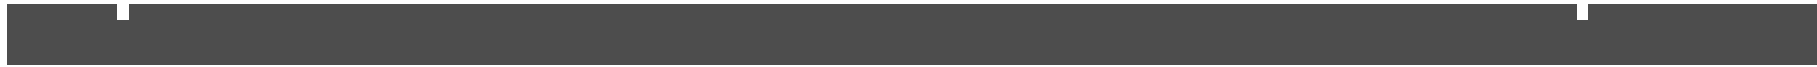

\*\*\*\*\*  
 UID132 GAAACCTGGTGCACCTGAAGCTCCCGGAAGGGGCGGCACAGGTCTTCCGGTTGCTGCCGCTGCAGAGAGCCCTGGGCAGACCCACAGCGAACCTGAGCCTCGGGAACACAGGTAAAGACCAAAATTTCTGCTGCAAGAAAAGCTGCCT 2919  
 UID711 GAAACCTGGTGCACCTGAAGCTCCCGGAAGGGGCGGCACAGGTCTTCCGGTTGCTGCCGCTGCAGAGAGCCCTGGGCAGACCCACAGCGAACCTGAGCCTCGGGAACACAGGTAAAGACCAAAATTTCTGCTGCAAGAAAAGCTGCCT 2316  
 UID26 GAAACCTGGTGCACCTGAAGCTCCCGGAAGGGGCGGCACAGGTCTTCCGGTTGCTGCCGCTGCAGAGAGCCCTGGGCAGACCCACAGCGAACCTGAGCCTCGGGAACACAGGTAAAGACCAAAATTTCTGCTGCAAGAAAAGCTGCCT 2316  
 UID44 GAAACCTGGTGCACCTGAAGCTCCCGGAAGGGGCGGCACAGGTCTTCCGGTTGCTGCCGCTGCAGAGAGCCCTGGGCAGACCCACAGCGAACCTGAGCCTCGGGAACACAGGTAAAGACCAAAATTTCTGCTGCAAGAAAAGCTGCCT 2316  
 UID341 GAAACCTGGTGCACCTGAAGCTCCCGGAAGGGGCGGCACAGGTCTTCCGGTTGCTGCCGCTGCAGAGAGCCCTGGGCAGACCCACAGCGAACCTGAGCCTCGGGAACACAGGTAAAGACCAAAATTTCTGCTGCAAGAAAAGCTGCCT 2316  
 UID125 GAAACCTGGTGCACCTGAAGCTCCCGGAAGGGGCGGCACAGGTCTTCCGGTTGCTGCCGCTGCAGAGAGCCCTGGGCAGACCCACAGCGAACCTGAGCCTCGGGAACACAGGTAAAGACCAAAATTTCTGCTGCAAGAAAAGCTGCCT 2316  
 UID308 GAAACCTGGTGCACCTGAAGCTCCCGGAAGGGGCGGCACAGGTCTTCCGGTTGCTGCCGCTGCAGAGAGCCCTGGGCAGACCCACAGCGAACCTGAGCCTCGGGAACACAGGTAAAGACCAAAATTTCTGCTGCAAGAAAAGCTGCCT 2316  
 L1-3  
 UID225 GAAACCTGGTGCACCTGAAGCTCCCGGAAGGGGCGGCACAGGTCTTCCGGTTGCTGCCGCTGCAGAGAGCCCTGGGCAGACCCACAGCGAACCTGAGCCTCGGGAACACAGGTAAAGACCAAAATTTCTGCTGCAAGAAAAGCTGCCT 438  
 ruler .....2860.....2870.....2880.....2890.....2900.....2910.....2920.....2930.....2940.....2950.....2960.....2970.....2980.....2990.....3000

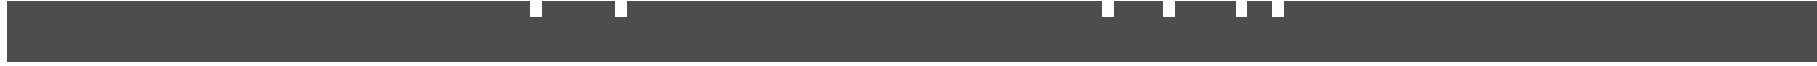



\*\*\*\*\*  
UID132\_ A CAAGAGAT GGAAGAGAGAA TCT CAGGAGC GGAAGAT TCCATAGAAA TCATTGACTCAA CTGTCAAAGATAA TGTAAAGCGGAAAAAGCTACTGGTCCAAAA CATACAGGAAA TCCAGGACTCAA T GAGAAGAT CAAA CCTAAGGATAA T 3669  
UID711\_ A CAAGAGAT GGAAGAGAGAA TCT CAGGAGC GGAAGAT TCCATAGAAA TCATTGACTCAA CTGTCAAAGATAA TGTAAAGCGGAAAAAGCTACTGGTCCAAAA CATACAGGAAA TCCAGGACTCAA T GAGAAGAT CAAA CCTAAGGATAA T 3066  
UID26\_ A CAAGAGAT GGAAGAGAGAA TCT CAGGAGC GGAAGAT TCCATAGAAA TCATTGACTCAA CTGTCAAAGATAA TGTAAAGCGGAAAAAGCTACTGGTCCAAAA CATACAGGAAA TCCAGGACTCAA T GAGAAGAT CAAA CCTAAGGATAA T 3066  
UID44\_ A CAAGAGAT GGAAGAGAGAA TCT CAGGAGC GGAAGAT TCCATAGAAA TCATTGACTCAA CTGTCAAAGATAA TGTAAAGCGGAAAAAGCTACTGGTCCAAAA CATACAGGAAA TCCAGGACTCAA T GAGAAGAT CAAA CCTAAGGATAA T 3066  
UID341\_ A CAAGAGAT GGAAGAGAGAA TCT CAGGAGC GGAAGAT TCCATAGAAA TCATTGACTCAA CTGTCAAAGATAA TGTAAAGCGGAAAAAGCTACTGGTCCAAAA CATACAGGAAA TCCAGGACTCAA T GAGAAGAT CAAA CCTAAGGATAA T 3066  
UID125\_ A CAAGAGAT GGAAGAGAGAA TCT CAGGAGC GGAAGAT TCCATAGAAA TCATTGACTCAA CTGTCAAAGATAA TGTAAAGCGGAAAAAGCTACTGGTCCAAAA CATACAGGAAA TCCAGGACTCAA T GAGAAGAT CAAA CCTAAGGATAA T 3066  
UID308\_ A CAAGAGAT GGAAGAGAGAA TCT CAGGAGC GGAAGAT TCCATAGAAA TCATTGACTCAA CTGTCAAAGATAA TGTAAAGCGGAAAAAGCTACTGGTCCAAAA CATACAGGAAA TCCAGGACTCAA T GAGAAGAT CAAA CCTAAGGATAA T 3066  
L1-3 A CAAGAGAT GGAAGAGAGAA TCT CAGGAGC GGAAGAT TCCATAGAAA TCATTGACTCAA CTGTCAAAGATAA TGTAAAGCGGAAAAAGCTACTGGTCCAAAA CATACAGGAAA TCCAGGACTCAA T GAGAAGAT CAAA CCTAAGGATAA T 1188  
UID225\_ A CAAGAGAT GGAAGAGAGAA TCT CAGGAGC GGAAGAT TCCATAGAAA TCATTGACTCAA CTGTCAAAGATAA TGTAAAGCGGAAAAAGCTACTGGTCCAAAA CATACAGGAAA TCCAGGACTCAA T GAGAAGAT CAAA CCTAAGGATAA T 3066  
ruler .....3610.....3620.....3630.....3640.....3650.....3660.....3670.....3680.....3690.....3700.....3710.....3720.....3730.....3740.....3750

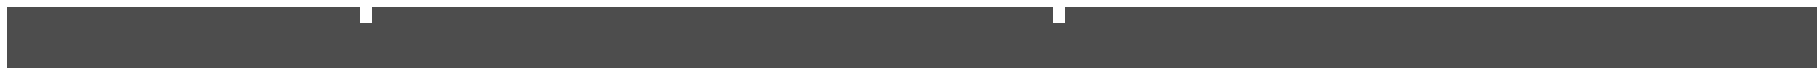

\*\*\*\*\*  
UID132\_ A GGTATAGAAGAGAGTGAAGACTCCCAGCTCAAAGGACCAGTAAATATCTTCAACAAAATCATAGAAGAAA CTCCCTAACCTAAAAAAGAGATA CCAATAGGCATA CAAGAAGCCTACAGAAC TCCAAA TAGATTGGACCAGAAAAG 3819  
UID711\_ A GGTATAGAAGAGAGTGAAGACTCCCAGCTCAAAGGACCAGTAAATATCTTCAACAAAATCATAGAAGAAA CTCCCTAACCTAAAAAAGAGATA CCAATAGGCATA CAAGAAGCCTACAGAAC TCCAAA TAGATTGGACCAGAAAAG 3216  
UID26\_ A GGTATAGAAGAGAGTGAAGACTCCCAGCTCAAAGGACCAGTAAATATCTTCAACAAAATCATAGAAGAAA CTCCCTAACCTAAAAAAGAGATA CCAATAGGCATA CAAGAAGCCTACAGAAC TCCAAA TAGATTGGACCAGAAAAG 3216  
UID44\_ A GGTATAGAAGAGAGTGAAGACTCCCAGCTCAAAGGACCAGTAAATATCTTCAACAAAATCATAGAAGAAA CTCCCTAACCTAAAAAAGAGATA CCAATAGGCATA CAAGAAGCCTACAGAAC TCCAAA TAGATTGGACCAGAAAAG 3216  
UID341\_ A GGTATAGAAGAGAGTGAAGACTCCCAGCTCAAAGGACCAGTAAATATCTTCAACAAAATCATAGAAGAAA CTCCCTAACCTAAAAAAGAGATA CCAATAGGCATA CAAGAAGCCTACAGAAC TCCAAA TAGATTGGACCAGAAAAG 3216  
UID125\_ A GGTATAGAAGAGAGTGAAGACTCCCAGCTCAAAGGACCAGTAAATATCTTCAACAAAATCATAGAAGAAA CTCCCTAACCTAAAAAAGAGATA CCAATAGGCATA CAAGAAGCCTACAGAAC TCCAAA TAGATTGGACCAGAAAAG 3216  
UID308\_ A GGTATAGAAGAGAGTGAAGACTCCCAGCTCAAAGGACCAGTAAATATCTTCAACAAAATCATAGAAGAAA CTCCCTAACCTAAAAAAGAGATA CCAATAGGCATA CAAGAAGCCTACAGAAC TCCAAA TAGATTGGACCAGAAAAG 3216  
L1-3 A GGTATAGAAGAGAGTGAAGACTCCCAGCTCAAAGGACCAGTAAATATCTTCAACAAAATCATAGAAGAAA CTCCCTAACCTAAAAAAGAGATA CCAATAGGCATA CAAGAAGCCTACAGAAC TCCAAA TAGATTGGACCAGAAAAG 1338  
UID225\_ A GGTATAGAAGAGAGTGAAGACTCCCAGCTCAAAGGACCAGTAAATATCTTCAACAAAATCATAGAAGAAA CTCCCTAACCTAAAAAAGAGATA CCAATAGGCATA CAAGAAGCCTACAGAAC TCCAAA TAGATTGGACCAGAAAAG 3216  
ruler .....3760.....3770.....3780.....3790.....3800.....3810.....3820.....3830.....3840.....3850.....3860.....3870.....3880.....3890.....3900

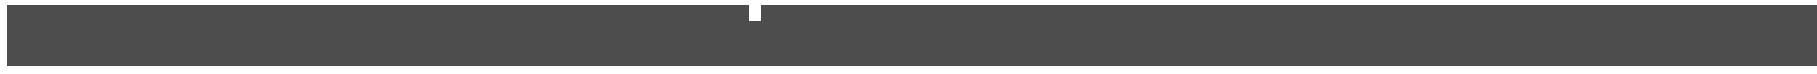

\*\*\*\*\*  
UID132\_ A AAACCTCCCGTCACTAATTTGTCAAACACCAAACCGCAAAAATAAGAAAAGAA TTTAAAAGCAGTAAAGGAAAAAGGTCAAGTAA CATATAAAGGGAGACCCTATCAGAA TCACACCAGACTTCTCGCCAGAAACTATGAAGGCCAG 3969  
UID711\_ A AAACCTCCCGTCACTAATTTGTCAAACACCAAACCGCAAAAATAAGAAAAGAA TTTAAAAGCAGTAAAGGAAAAAGGTCAAGTAA CATATAAAGGGAGACCCTATCAGAA TCACACCAGACTTCTCGCCAGAAACTATGAAGGCCAG 3366  
UID26\_ A AAACCTCCCGTCACTAATTTGTCAAACACCAAACCGCAAAAATAAGAAAAGAA TTTAAAAGCAGTAAAGGAAAAAGGTCAAGTAA CATATAAAGGGAGACCCTATCAGAA TCACACCAGACTTCTCGCCAGAAACTATGAAGGCCAG 3366  
UID44\_ A AAACCTCCCGTCACTAATTTGTCAAACACCAAACCGCAAAAATAAGAAAAGAA TTTAAAAGCAGTAAAGGAAAAAGGTCAAGTAA CATATAAAGGGAGACCCTATCAGAA TCACACCAGACTTCTCGCCAGAAACTATGAAGGCCAG 3366  
UID341\_ A AAACCTCCCGTCACTAATTTGTCAAACACCAAACCGCAAAAATAAGAAAAGAA TTTAAAAGCAGTAAAGGAAAAAGGTCAAGTAA CATATAAAGGGAGACCCTATCAGAA TCACACCAGACTTCTCGCCAGAAACTATGAAGGCCAG 3366  
UID125\_ A AAACCTCCCGTCACTAATTTGTCAAACACCAAACCGCAAAAATAAGAAAAGAA TTTAAAAGCAGTAAAGGAAAAAGGTCAAGTAA CATATAAAGGGAGACCCTATCAGAA TCACACCAGACTTCTCGCCAGAAACTATGAAGGCCAG 3366  
UID308\_ A AAACCTCCCGTCACTAATTTGTCAAACACCAAACCGCAAAAATAAGAAAAGAA TTTAAAAGCAGTAAAGGAAAAAGGTCAAGTAA CATATAAAGGGAGACCCTATCAGAA TCACACCAGACTTCTCGCCAGAAACTATGAAGGCCAG 3366  
L1-3 A AAACCTCCCGTCACTAATTTGTCAAACACCAAACCGCAAAAATAAGAAAAGAA TTTAAAAGCAGTAAAGGAAAAAGGTCAAGTAA CATATAAAGGGAGACCCTATCAGAA TCACACCAGACTTCTCGCCAGAAACTATGAAGGCCAG 1488  
UID225\_ A AAACCTCCCGTCACTAATTTGTCAAACACCAAACCGCAAAAATAAGAAAAGAA TTTAAAAGCAGTAAAGGAAAAAGGTCAAGTAA CATATAAAGGGAGACCCTATCAGAA TCACACCAGACTTCTCGCCAGAAACTATGAAGGCCAG 3366  
ruler .....3910.....3920.....3930.....3940.....3950.....3960.....3970.....3980.....3990.....4000.....4010.....4020.....4030.....4040.....4050

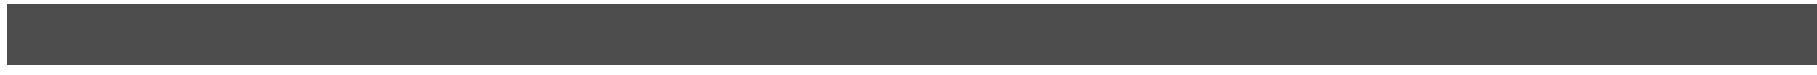

\*\*\*\*\*  
UID132\_ A AAGATCCTGGACTGATGTCATACAGACCCTAAGAGAACA CAAATGCCAGCCCAGGTTACTGTATCCAGCAAAACTCTCAATTAACATTGATGGAGAAA CCAAGATATTCATGACAAAACCAAATTTACACAATATCTTTCTACAAATCC 4119  
UID711\_ A AAGATCCTGGACTGATGTCATACAGACCCTAAGAGAACA CAAATGCCAGCCCAGGTTACTGTATCCAGCAAAACTCTCAATTAACATTGATGGAGAAA CCAAGATATTCATGACAAAACCAAATTTACACAATATCTTTCTACAAATCC 3516  
UID26\_ A AAGATCCTGGACTGATGTCATACAGACCCTAAGAGAACA CAAATGCCAACCAGGTTACTGTATCCAGCAAAACTCTCAATTAACATTGATGGAGAAA CCAAGATATTCATGACAAAACCAAATTTACACAATATCTTTCTACAAATCC 3516  
UID44\_ A AAGATCCTGGACTGATGTCATACAGACCCTAAGAGAACA CAAATGCCAGCCCAGGTTACTGTATCCAGCAAAACTCTCAATTAACATTGATGGAGAAA CCAAGATATTCATGACAAAACCAAATTTACACAATATCTTTCTACAAATCC 3516  
UID341\_ A AAGATCCTGGACTGATGTCATACAGACCCTAAGAGAACA CAAATGCCAGCCCAGGTTACTGTATCCAGCAAAACTCTCAATTAACATTGATGGAGAAA CCAAGATATTCATGACAAAACCAAATTTACACAATATCTTTCTACAAATCC 3516  
UID125\_ A AAGATCCTGGACTGATGTCATACAGACCCTAAGAGAACA CAAATGCCAGCCCAGGTTACTGTATCCAGCAAAACTCTCAATTAACATTGATGGAGAAA CCAAGATATTCATGACAAAACCAAATTTACACAATATCTTTCTACAAATCC 3516  
UID308\_ A AAGATCCTGGACTGATGTCATACAGACCCTAAGAGAACA CAAATGCCAGCCCAGGTTACTGTATCCAGCAAAACTCTCAATTAACATTGATGGAGAAA CCAAGATATTCATGACAAAACCAAATTTACACAATATCTTTCTACAAATCC 3516  
L1-3 A AAGATCCTGGACTGATGTCATACAGACCCTAAGAGAACA CAAATGCCAGCCCAGGTTACTGTATCCAGCAAAACTCTCAATTAACATTGATGGAGAAA CCAAGATATTCATGACAAAACCAAATTTACACAATATCTTTCTACAAATCC 1638  
UID225\_ A AAGATCCTGGACTGATGTCATACAGACCCTAAGAGAACA CAAATGCCAGCCCAGGTTACTGTATCCAGCAAAACTCTCAATTAACATTGATGGAGAAA CCAAGATATTCATGACAAAACCAAATTTACACAATATCTTTCTACAAATCC 3516  
ruler .....4060.....4070.....4080.....4090.....4100.....4110.....4120.....4130.....4140.....4150.....4160.....4170.....4180.....4190.....4200

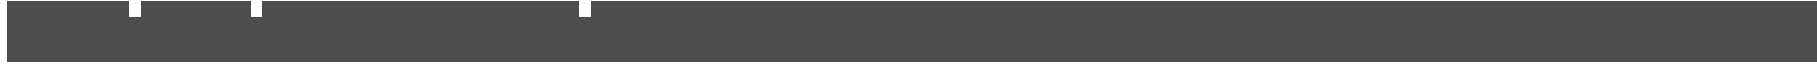

\*\*\*\*\*  
UID132 AGCACTACAAAGGATAATAAATGGTAAAGCCCAACATAAGGAGGCCAAGCTATACCCCTAGAAGAAGCAAGAAAATAAATCGTCTTGGCAAACAAAACAAAGAGAAATGAAAGCACACAAACATAAAGGAGG 4268  
UID711 AGCACTACAAAGGATAATAAATGGTAAAGCCCAACATAAGGAGGCCAAGCTATACCCCTAGAAGAAGCAAGAAAATAAATCGTCTTGGCAAACAAAACAAAGAGAAATGAAAGCACACAAACATAAAGGAGG 3665  
UID26 AGCACTACAAAGGATAATAAATGGTAAAGCCCAACATAAGGAGGCCAAGCTATACCCCTAGAAGAAGCAAGAAAATAAATCGTCTTGGCAAACAAAACAAAGAGAAATGAAAGCACACAAACATAAAGGAGG 3665  
UID44 AGCACTACAAAGGATAATAAATGGTAAAGCCCAACATAAGGAGGCCAAGCTATACCCCTAGAAGAAGCAAGAAAATAAATCGTCTTGGCAAACAAAACAAAGAGAAATGAAAGCACACAAACATAAAGGAGG 3665  
UID341 AGCACTACAAAGGATAATAAATGGTAAAGCCCAACATAAGGAGGCCAAGCTATACCCCTAGAAGAAGCAAGAAAATAAATCGTCTTGGCAAACAAAACAAAGAGAAATGAAAGCACACAAACATAAAGGAGG 3665  
UID125 AGCACTACAAAGGATAATAAATGGTAAAGCCCAACATAAGGAGGCCAAGCTATACCCCTAGAAGAAGCAAGAAAATAAATCGTCTTGGCAAACAAAACAAAGAGAAATGAAAGCACACAAACATAAAGGAGG 3665  
UID308 AGCACTACAAAGGATAATAAATGGTAAAGCCCAACATAAGGAGGCCAAGCTATACCCCTAGAAGAAGCAAGAAAATAAATCGTCTTGGCAAACAAAACAAAGAGAAATGAAAGCACACAAACATAAAGGAGG 3665  
L1-3 AGCACTACAAAGGATAATAAATGGTAAAGCCCAACATAAGGAGGCCAAGCTATACCCCTAGAAGAAGCAAGAAAATAAATCGTCTTGGCAAACAAAACAAAGAGAAATGAAAGCACACAAACATAAAGGAGG 1788  
UID225 AGCACTACAAAGGATAATAAATGGTAAAGCCCAACATAAGGAGGCCAAGCTATACCCCTAGAAGAAGCAAGAAAATAAATCGTCTTGGCAAACAAAACAAAGAGAAATGAAAGCACACAAACATAAAGGAGG 3665  
ruler .....4210.....4220.....4230.....4240.....4250.....4260.....4270.....4280.....4290.....4300.....4310.....4320.....4330.....4340.....4350

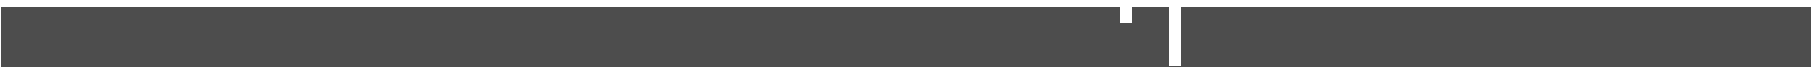

\*\*\*\*\*  
UID132 AAAACAATAACACTATTCCTTAATATCTCTCAATATCAATGGCCTCACTCCCAATAAAAAAGACATAGATTAAACAACTGGATACGCACGAGGACCCCTGCATTCTGCTGCCACAGGAAACACACCTCAGAGACAAAGACAGACACTA 4418  
UID711 AAAACAATAACACTATTCCTTAATATCTCTCAATATCAATGGCCTCACTCCCAATAAAAAAGACATAGATTAAACAACTGGATACGCACGAGGACCCCTGCATTCTGCTGCCACAGGAAACACACCTCAGAGACAAAGACAGACACTA 3815  
UID26 AAAACAATAACACTATTCCTTAATATCTCTCAATATCAATGGCCTCACTCCCAATAAAAAAGACATAGATTAAACAACTGGATACGCACGAGGACCCCTGCATTCTGCTGCCACAGGAAACACACCTCAGAGACAAAGACAGACACTA 3815  
UID44 AAAACAATAACACTATTCCTTAATATCTCTCAATATCAATGGCCTCACTCCCAATAAAAAAGACATAGATTAAACAACTGGATACGCACGAGGACCCCTGCATTCTGCTGCCACAGGAAACACACCTCAGAGACAAAGACAGACACTA 3815  
UID341 AAAACAATAACACTATTCCTTAATATCTCTCAATATCAATGGCCTCACTCCCAATAAAAAAGACATAGATTAAACAACTGGATACGCACGAGGACCCCTGCATTCTGCTGCCACAGGAAACACACCTCAGAGACAAAGACAGACACTA 3815  
UID125 AAAACAATAACACTATTCCTTAATATCTCTCAATATCAATGGCCTCACTCCCAATAAAAAAGACATAGATTAAACAACTGGATACGCACGAGGACCCCTGCATTCTGCTGCCACAGGAAACACACCTCAGAGACAAAGACAGACACTA 3815  
UID308 AAAACAATAACACTATTCCTTAATATCTCTCAATATCAATGGCCTCACTCCCAATAAAAAAGACATAGATTAAACAACTGGATACGCACGAGGACCCCTGCATTCTGCTGCCACAGGAAACACACCTCAGAGACAAAGACAGACACTA 3815  
L1-3 AAAACAATAACACTATTCCTTAATATCTCTCAATATCAATGGCCTCACTCCCAATAAAAAAGACATAGATTAAACAACTGGATACGCACGAGGACCCCTGCATTCTGCTGCCACAGGAAACACACCTCAGAGACAAAGACAGACACTA 1938  
UID225 AAAACAATAACACTATTCCTTAATATCTCTCAATATCAATGGCCTCACTCCCAATAAAAAAGACATAGATTAAACAACTGGATACGCACGAGGACCCCTGCATTCTGCTGCCACAGGAAACACACCTCAGAGACAAAGACAGACACTA 3815  
ruler .....4360.....4370.....4380.....4390.....4400.....4410.....4420.....4430.....4440.....4450.....4460.....4470.....4480.....4490.....4500

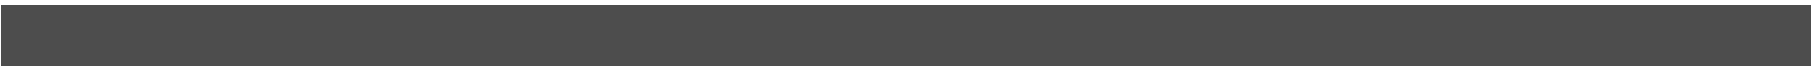

\*\*\*\*\*  
UID132 CCTCAGAGTGAAAGGCTGGAAAAACAATTTCCAAGCAAAATGGTCAGAAGAAGCAAGCTGGAGTAGCCATTCTAATAACAAATAAAATCAATTTCCAATAAAAGTCATCAAAAAAGATAAGGAAGGACACTTCATATTATCAAAAGGAAA 4568  
UID711 CCTCAGAGTGAAAGGCTGGAAAAACAATTTCCAAGCAAAATGGTCAGAAGAAGCAAGCTGGAGTAGCCATTCTAATAACAAATAAAATCAATTTCCAATAAAAGTCATCAAAAAAGATAAGGAAGGACACTTCATATTATCAAAAGGAAA 3965  
UID26 CCTCAGAGTGAAAGGCTGGAAAAACAATTTCCAAGCAAAATGGTCAGAAGAAGCAAGCTGGAGTAGCCATTCTAATAACAAATAAAATCAATTTCCAATAAAAGTCATCAAAAAAGATAAGGAAGGACACTTCATATTATCAAAAGGAAA 3965  
UID44 CCTCAGAGTGAAAGGCTGGAAAAACAATTTCCAAGCAAAATGGTCAGAAGAAGCAAGCTGGAGTAGCCATTCTAATAACAAATAAAATCAATTTCCAATAAAAGTCATCAAAAAAGATAAGGAAGGACACTTCATATTATCAAAAGGAAA 3965  
UID341 CCTCAGAGTGAAAGGCTGGAAAAACAATTTCCAAGCAAAATGGTCAGAAGAAGCAAGCTGGAGTAGCCATTCTAATAACAAATAAAATCAATTTCCAATAAAAGTCATCAAAAAAGATAAGGAAGGACACTTCATATTATCAAAAGGAAA 3965  
UID125 CCTCAGAGTGAAAGGCTGGAAAAACAATTTCCAAGCAAAATGGTCAGAAGAAGCAAGCTGGAGTAGCCATTCTAATAACAAATAAAATCAATTTCCAATAAAAGTCATCAAAAAAGATAAGGAAGGACACTTCATATTATCAAAAGGAAA 3965  
UID308 CCTCAGAGTGAAAGGCTGGAAAAACAATTTCCAAGCAAAATGGTCAGAAGAAGCAAGCTGGAGTAGCCATTCTAATAACAAATAAAATCAATTTCCAATAAAAGTCATCAAAAAAGATAAGGAAGGACACTTCATATTATCAAAAGGAAA 3965  
L1-3 CCTCAGAGTGAAAGGCTGGAAAAACAATTTCCAAGCAAAATGGTCAGAAGAAGCAAGCTGGAGTAGCCATTCTAATAACAAATAAAATCAATTTCCAATAAAAGTCATCAAAAAAGATAAGGAAGGACACTTCATATTATCAAAAGGAAA 2088  
UID225 CCTCAGAGTGAAAGGCTGGAAAAACAATTTCCAAGCAAAATGGTCAGAAGAAGCAAGCTGGAGTAGCCATTCTAATAACAAATAAAATCAATTTCCAATAAAAGTCATCAAAAAAGATAAGGAAGGACACTTCATATTATCAAAAGGAAA 3965  
ruler .....4510.....4520.....4530.....4540.....4550.....4560.....4570.....4580.....4590.....4600.....4610.....4620.....4630.....4640.....4650

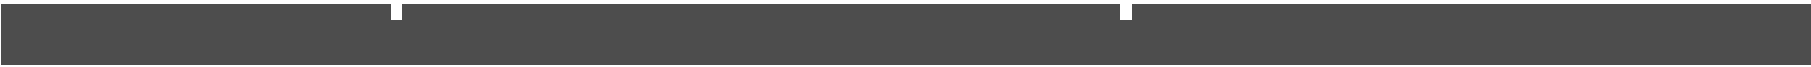

\*\*\*\*\*  
UID132 AATCCACCAAGATGAACCTCAATCCTAAAATATCTATGCCCCAAATACAAGGGCCTACATACGTAAAAGAAAACCTTACTAAAAGCTCAAAAACACACATTGCACCTCACACAAATAAGTGGGAGATTTCAACACCCCACTCTCATCAAT 4718  
UID711 AATCCACCAAGATGAACCTCAATCCTAAAATATCTATGCCCCAAATACAAGGGCCTACATACGTAAAAGAAAACCTTACTAAAAGCTCAAAAACACACATTGCACCTCACACAAATAAGTGGGAGATTTCAACACCCCACTCTCATCAAT 4115  
UID26 AATCCACCAAGATGAACCTCAATCCTAAAATATCTATGCCCCAAATACAAGGGCCTACATACGTAAAAGAAAACCTTACTAAAAGCTCAAAAACACACATTGCACCTCACACAAATAAGTGGGAGATTTCAACACCCCACTCTCATCAAT 4115  
UID44 AATCCACCAAGATGAACCTCAATCCTAAAATATCTATGCCCCAAATACAAGGGCCTACATACGTAAAAGAAAACCTTACTAAAAGCTCAAAAACACACATTGCACCTCACACAAATAAGTGGGAGATTTCAACACCCCACTCTCATCAAT 4115  
UID341 AATCCACCAAGATGAACCTCAATCCTAAAATATCTATGCCCCAAATACAAGGGCCTACATACGTAAAAGAAAACCTTACTAAAAGCTCAAAAACACACATTGCACCTCACACAAATAAGTGGGAGATTTCAACACCCCACTCTCATCAAT 4115  
UID125 AATCCACCAAGATGAACCTCAATCCTAAAATATCTATGCCCCAAATACAAGGGCCTACATACGTAAAAGAAAACCTTACTAAAAGCTCAAAAACACACATTGCACCTCACACAAATAAGTGGGAGATTTCAACACCCCACTCTCATCAAT 4115  
UID308 AATCCACCAAGATGAACCTCAATCCTAAAATATCTATGCCCCAAATACAAGGGCCTACATACGTAAAAGAAAACCTTACTAAAAGCTCAAAAACACACATTGCACCTCACACAAATAAGTGGGAGATTTCAACACCCCACTCTCATCAAT 4115  
L1-3 AATCCACCAAGATGAACCTCAATCCTAAAATATCTATGCCCCAAATACAAGGGCCTACATACGTAAAAGAAAACCTTACTAAAAGCTCAAAAACACACATTGCACCTCACACAAATAAGTGGGAGATTTCAACACCCCACTCTCATCAAT 2238  
UID225 AATCCACCAAGATGAACCTCAATCCTAAAATATCTATGCCCCAAATACAAGGGCCTACATACGTAAAAGAAAACCTTACTAAAAGCTCAAAAACACACATTGCACCTCACACAAATAAGTGGGAGATTTCAACACCCCACTCTCATCAAT 4115  
ruler .....4660.....4670.....4680.....4690.....4700.....4710.....4720.....4730.....4740.....4750.....4760.....4770.....4780.....4790.....4800

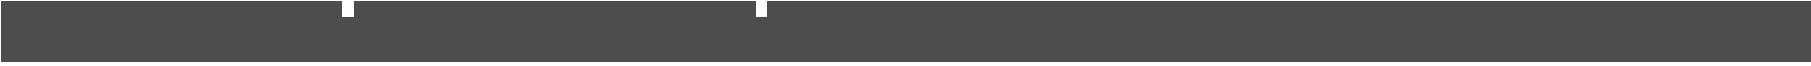





\*\*\*\*\*  
UID132\_ GACCA TAGAAAGAA TCAA CAGGACCAAAG TTGGTCTTT GAGAAAA TCAA CAAGATAGATA AAA CCGTTAGCCAGA CTAA CGAGAGGACA CAGAGAGTGCAT CCAAATTAACAAAATCAGAAATGAAAAGGGAGACATAACTACAGATTTC 5468  
UID711\_ GACCA TAGAAAGAA TCAA CAGGACCAAAG TTGGTCTTT GAGAAAA TCAA CAAGATAGATA AAA CCGTTAGCCAGA CTAA CGAGAGGACA CAGAGAGTGCCT CCAAATTAACAAAATCAGAAATGAAAAGGGAGACATAACTACAGATTTC 4865  
UID26\_ GACCA TAGAAAGAA TCAA CAGGACCAAAG TTGGTCTTT GAGAAAA TCAA CAAGATAGATA AAA CCGTTAGCCAGA CTAA CGAGAGGACA CAGAGAGTGCCT CCAAATTAACAAAATCAGAAATGAAAAGGGAGACATAACTACAGATTTC 4865  
UID44\_ GACCA TAGAAAGAA TCAA CAGGACCAAAG TTGGTCTTT GAGAAAA TCAA CAAGATAGATA AAA CCGTTAGCCAGA CTAA CGAGAGGACA CAGAGAGTGCCT CCAAATTAACAAAATCAGAAATGAAAAGGGAGACATAACTACAGATTTC 4865  
UID341\_ GACCA TAGAAAGAA TCAA CAGGACCAAAG TTGGTCTTT GAGAAAA TCAA CAAGATAGATA AAA CCGTTAGCCAGA CTAA CGAGAGGACA CAGAGAGTGCCT CCAAATTAACAAAATCAGAAATGAAAAGGGAGACATAACTACAGATTTC 4865  
UID125\_ GACCA TAGAAAGAA TCAA CAGGACCAAAG TTGGTCTTT GAGAAAA TCAA CAAGATAGATA AAA CCGTTAGCCAGA CTAA CGAGAGGACA CAGAGAGTGCCT CCAAATTAACAAAATCAGAAATGAAAAGGGAGACATAACTACAGATTTC 4865  
UID308\_ GACCA TAGAAAGAA TCAA CAGGACCAAAG TTGGTCTTT GAGAAAA TCAA CAAGATAGATA AAA CCGTTAGCCAGA CTAA CGAGAGGACA CAGAGAGTGCCT CCAAATTAACAAAATCAGAAATGAAAAGGGAGACATAACTACAGATTTC 4865  
L1-3\_ GACCA TAGAAAGAA TCAA CAGGACCAAAG TTGGTCTTT GAGAAAA TCAA CAAGATAGATA AAA CCGTTAGCCAGA CTAA CGAGAGGACA CAGAGAGTGCCT CCAAATTAACAAAATCAGAAATGAAAAGGGAGACATAACTACAGATTTC 2988  
UID225\_ GACCA TAGAAAGAA TCAA CAGGACCAAAG TTGGTCTTT GAGAAAA TCAA CAAGATAGATA AAA CCGTTAGCCAGA CTAA CGAGAGGACA CAGAGAGTGCCT CCAAATTAACAAAATCAGAAATGAAAAGGGAGACATAACTACAGATTTC 4865  
ruler .....5410.....5420.....5430.....5440.....5450.....5460.....5470.....5480.....5490.....5500.....5510.....5520.....5530.....5540.....5550

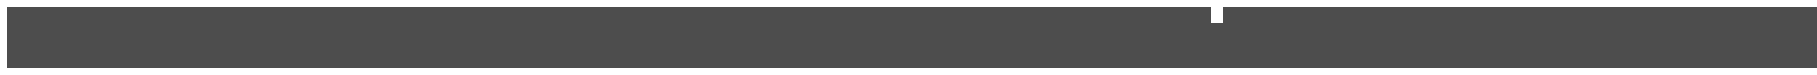

\*\*\*\*\*  
UID132\_ AGAGGAAAT TCAAAAAATCATCAGATCTTACTATAAAAA CCTATAT TCAACAAAATTTGAAAA TCTTCAGGAAATGGACTATTT CCTAGACAGATACCAGGTATCAAAGTTAAATCAGGAACAGATAAACCCAGTTAAACAACCCCATTAAC 5618  
UID711\_ AGAGGAAAT TCAAAAAATCATCAGATCTTACTATAAAAA CCTATAT TCAACAAAATTTGAAAA TCTTCAGGAAATGGACTATTT CCTAGACAGATACCAGGTATCAAAGTTAAATCAGGAACAGATAAACCCAGTTAAACAACCCCATTAAC 5015  
UID26\_ AGAGGAAAT TCAAAAAATCATCAGATCTTACTATAAAAA CCTATAT TCAACAAAATTTGAAAA TCTTCAGGAAATGGACTATTT CCTAGACAGATACCAGGTATCAAAGTTAAATCAGGAACAGATAAACCCAGTTAAACAACCCCATTAAC 5015  
UID44\_ AGAGGAAAT TCAAAAAATCATCAGATCTTACTATAAAAA CCTATAT TCAACAAAATTTGAAAA TCTTCAGGAAATGGACTATTT CCTAGACAGATACCAGGTATCAAAGTTAAATCAGGAACAGATAAACCCAGTTAAACAACCCCATTAAC 5015  
UID341\_ AGAGGAAAT TCAAAAAATCATCAGATCTTACTATAAAAA CCTATAT TCAACAAAATTTGAAAA TCTTCAGGAAATGGACTATTT CCTAGACAGATACCAGGTATCAAAGTTAAATCAGGAACAGATAAACCCAGTTAAACAACCCCATTAAC 5015  
UID125\_ AGAGGAAAT TCAAAAAATCATCAGATCTTACTATAAAAA CCTATAT TCAACAAAATTTGAAAA TCTTCAGGAAATGGACTATTT CCTAGACAGATACCAGGTATCAAAGTTAAATCAGGAACAGATAAACCCAGTTAAACAACCCCATTAAC 5015  
UID308\_ AGAGGAAAT TCAAAAAATCATCAGATCTTACTATAAAAA CCTATAT TCAACAAAATTTGAAAA TCTTCAGGAAATGGACTATTT CCTAGACAGATACCAGGTATCAAAGTTAAATCAGGAACAGATAAACCCAGTTAAACAACCCCATTAAC 5015  
L1-3\_ AGAGGAAAT TCAAAAAATCATCAGATCTTACTATAAAAA CCTATAT TCAACAAAATTTGAAAA TCTTCAGGAAATGGACTATTT CCTAGACAGATACCAGGTATCAAAGTTAAATCAGGAACAGATAAACCCAGTTAAACAACCCCATTAAC 3138  
UID225\_ AGAGGAAAT TCAAAAAATCATCAGATCTTACTATAAAAA CCTATAT TCAACAAAATTTGAAAA TCTTCAGGAAATGGACTATTT CCTAGACAGATACCAGGTATCAAAGTTAAATCAGGAACAGATAAACCCAGTTAAACAACCCCATTAAC 5015  
ruler .....5560.....5570.....5580.....5590.....5600.....5610.....5620.....5630.....5640.....5650.....5660.....5670.....5680.....5690.....5700

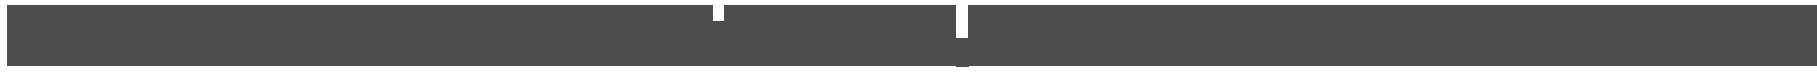

\*\*\*\*\*  
UID132\_ TCCTAAGGAAATAGAAGCAGTCATTAAGAGGCTCCCAA CCAAAAAGAGCCAGGTCCAGATGGGTTTAGTGCAGAAATCTATCAAACCTTCA TAGAAGACCTCATAACCAATATTTATCCAACTATTCCACAAAA TTGAAACAGATGGAGC 5768  
UID711\_ TCCTAAGGAAATAGAAGCAGTCATTAAGAGGCTCCCAA CCAAAAAGAGCCAGGTCCAGATGGGTTTAGTGCAGAAATCTATCAAACCTTCA TAGAAGACCTCATAACCAATATTTATCCAACTATTCCACAAAA TTGAAACAGATGGAGC 5165  
UID26\_ TCCTAAGGAAATAGAAGCAGTCATTAAGAGGCTCCCAA CCAAAAAGAGCCAGGTCCAGATGGGTTTAGTGCAGAAATCTATCAAACCTTCA TAGAAGACCTCATAACCAATATTTATCCAACTATTCCACAAAA TTGAAACAGATGGAGC 5165  
UID44\_ TCCTAAGGAAATAGAAGCAGTCATTAAGAGGCTCCCAA CCAAAAAGAGCCAGGTCCAGATGGGTTTAGTGCAGAAATCTATCAAACCTTCA TAGAAGACCTCATAACCAATATTTATCCAACTATTCCACAAAA TTGAAACAGATGGAGC 5165  
UID341\_ TCCTAAGGAAATAGAAGCAGTCATTAAGAGGCTCCCAA CCAAAAAGAGCCAGGTCCAGATGGGTTTAGTGCAGAAATCTATCAAACCTTCA TAGAAGACCTCATAACCAATATTTATCCAACTATTCCACAAAA TTGAAACAGATGGAGC 5165  
UID125\_ TCCTAAGGAAATAGAAGCAGTCATTAAGAGGCTCCCAA CCAAAAAGAGCCAGGTCCAGATGGGTTTAGTGCAGAAATCTATCAAACCTTCA TAGAAGACCTCATAACCAATATTTATCCAACTATTCCACAAAA TTGAAACAGATGGAGC 5165  
UID308\_ TCCTAAGGAAATAGAAGCAGTCATTAAGAGGCTCCCAA CCAAAAAGAGCCAGGTCCAGATGGGTTTAGTGCAGAAATCTATCAAACCTTCA TAGAAGACCTCATAACCAATATTTATCCAACTATTCCACAAAA TTGAAACAGATGGAGC 5165  
L1-3\_ TCCTAAGGAAATAGAAGCAGTCATTAAGAGGCTCCCAA CCAAAAAGAGCCAGGTCCAGATGGGTTTAGTGCAGAAATCTATCAAACCTTCA TAGAAGACCTCATAACCAATATTTATCCAACTATTCCACAAAA TTGAAACAGATGGAGC 3288  
UID225\_ TCCTAAGGAAATAGAAGCAGTCATTAAGAGGCTCCCAA CCAAAAAGAGCCAGGTCCAGATGGGTTTAGTGCAGAAATCTATCAAACCTTCA TAGAAGACCTCATAACCAATATTTATCCAACTATTCCACAAAA TTGAAACAGATGGAGC 5165  
ruler .....5710.....5720.....5730.....5740.....5750.....5760.....5770.....5780.....5790.....5800.....5810.....5820.....5830.....5840.....5850



\*\*\*\*\*  
UID132\_ CCTACCAGAAATTCCTTCTACGAACTCAAACTACTCTTATACCTAAACCACA CAAAGACA CAACAAGAAAGAGAACTTCAGACCAATTTCCCTTATGAATATCGACGCAAAAA TACTCAATAAAAATCTGGCAAACCGAATTC AAGAGCA 5918  
UID711\_ CCTACCAGAAATTCCTTCTACGAACTCAAACTACTCTTATACCTAAACCACA CAAAGACA CAACAAGAAAGAGAACTTCAGACCAATTTCCCTTATGAATATCGACGCAAAAA TACTCAATAAAAATCTGGCAAACCGAATTC AAGAGCA 5315  
UID26\_ CCTACCAGAAATTCCTTCTACGAACTCAAACTACTCTTATACCTAAACCACA CAAAGACA CAACAAGAAAGAGAACTTCAGACCAATTTCCCTTATGAATATCGCCGCAAAAA TACTCAATAAAAATCTGGCAAACCGAATTC AAGAGCA 5315  
UID44\_ CCTACCAGAAATTCCTTCTACGAACTCAAACTACTCTTATACCTAAACCACA CAAAGACA CAACAAGAAAGAGAACTTCAGACCAATTTCCCTTATGAATATCGACGCAAAAA TACTCAATAAAAATCTGGCAAACCGAATTC AAGAGCA 5315  
UID341\_ CCTACCAGAAATTCCTTCTACGAACTCAAACTACTCTTATACCTAAACCACA CAAAGACA CAACAAGAAAGAGAACTTCAGACCAATTTCCCTTATGAATATCGACGCAAAAA TACTCAATAAAAATCTGGCAAACCGAATTC AAGAGCA 5315  
UID125\_ CCTACCAGAAATTCCTTCTACGAACTCAAACTACTCTTATACCTAAACCACA CAAAGACA CAACAAGAAAGAGAACTTCAGACCAATTTCCCTTATGAATATCGACGCAAAAA TACTCAATAAAAATCTGGCAAACCGAATTC AAGAGCA 5315  
UID308\_ CCTACCAGAAATTCCTTCTACGAACTCAAACTACTCTTATACCTAAACCACA CAAAGACA CAACAAGAAAGAGAACTTCAGACCAATTTCCCTTATGAATATCGACGCAAAAA TACTCAATAAAAATCTGGCAAACCGAATTC AAGAGCA 5315  
L1-3\_ CCTACCAGAAATTCCTTCTACGAACTCAAACTACTCTTATACCTAAACCACA CAAAGACA CAACAAGAAAGAGAACTTCAGACCAATTTCCCTTATGAATATCGACGCAAAAA TACTCAATAAAAATCTGGCAAACCGAATTC AAGAGCA 3438  
UID225\_ CCTACCAGAAATTCCTTCTACGAACTCAAACTACTCTTATACCTAAACCACA CAAAGACA CAACAAGAAAGAGAACTTCAGACCAATTTCCCTTATGAATATCGACGCAAAAA TACTCAATAAAAATCTGGCAAACCGAATTC AAGAGCA 5315  
ruler .....5860.....5870.....5880.....5890.....5900.....5910.....5920.....5930.....5940.....5950.....5960.....5970.....5980.....5990.....6000

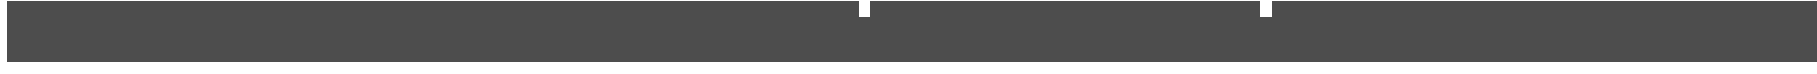





\*\*\*\*\*  
UID132 ACCCTGTACAAGCTTAAGTCGAAGTGGATCAAGGACCTCCACATCAAACCAGACACACTCAAATAATAGAAGAAAACTAGGGAAGCATCTGGAAACATGGGCCTGGAAAAAATTTCCTGAACAAAACACCAATGGCTTATGCTCT 7268  
UID711 ACCCTGTACAAGCTTAAGTCGAAGTGGATCAAGGACCTCCACATCAAACCAGACACACTCAAATAATAGAAGAAAACTAGGGAAGCATCTGGAAACATGGGCCTGGAAAAAATTTCCTGAACAAAACACCAATGGCTTATGCTCT 6665  
UID26 ACCCTGTACAAGCTTAAGTCGAAGTGGATCAAGGACCTCCACATCAAACCAGACACACTCAAATAATAGAAGAAAACTAGGGAAGCATCTGGAAACATGGGCCTGGAAAAAATTTCCTGAACAAAACACCAATGGCTTATGCTCT 6665  
UID44 ACCCTGTACAAGCTTAAGTCGAAGTGGATCAAGGACCTCCACATCAAACCAGACACACTCAAATAATAGAAGAAAACTAGGGAAGCATCTGGAAACATGGGCCTGGAAAAAATTTCCTGAACAAAACACCAATGGCTTATGCTCT 6665  
UID341 ACCCTGTACAAGCTTAAGTCGAAGTGGATCAAGGACCTCCACATCAAACCAGACACACTCAAATAATAGAAGAAAACTAGGGAAGCATCTGGAAACATGGGCCTGGAAAAAATTTCCTGAACAAAACACCAATGGCTTATGCTCT 6665  
UID125 ACCCTGTACAAGCTTAAGTCGAAGTGGATCAAGGACCTCCACATCAAACCAGACACACTCAAATAATAGAAGAAAACTAGGGAAGCATCTGGAAACATGGGCCTGGAAAAAATTTCCTGAACAAAACACCAATGGCTTATGCTCT 6665  
UID308 ACCCTGTACAAGCTTAAGTCGAAGTGGATCAAGGACCTCCACATCAAACCAGACACACTCAAATAATAGAAGAAAACTAGGGAAGCATCTGGAAACATGGGCCTGGAAAAAATTTCCTGAACAAAACACCAATGGCTTATGCTCT 6665  
L1-3 ACCCTGTACAAGCTTAAGTCGAAGTGGATCAAGGACCTCCACATCAAACCAGACACACTCAAATAATAGAAGAAAACTAGGGAAGCATCTGGAAACATGGGCCTGGAAAAAATTTCCTGAACAAAACACCAATGGCTTATGCTCT 4788  
UID225 ACCCTGTACAAGCTTAAGTCGAAGTGGATCAAGGACCTCCACATCAAACCAGACACACTCAAATAATAGAAGAAAACTAGGGAAGCATCTGGAAACATGGGCCTGGAAAAAATTTCCTGAACAAAACACCAATGGCTTATGCTCT 6665  
ruler .....7210.....7220.....7230.....7240.....7250.....7260.....7270.....7280.....7290.....7300.....7310.....7320.....7330.....7340.....7350

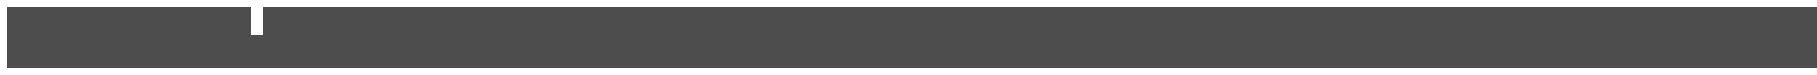

\*\*\*\*\*  
UID132 AAGATCAAGAATTGACAAATGGGATCTCATAAAACTGCAAAGCTTCTGTAAGGCAAAGGACACTGTGGTTAGGACAAAACGGCAACCAACAGATTTGGAAAAAGATCTTTACCAACCCCTACAAAGATAGAGGCCCTTATATCCAAAAATATA 7418  
UID711 AAGATCAAGAATTGACAAATGGGATCTCATAAAACTGCAAAGCTTCTGTAAGGCAAAGGACACTGTGGTTAGGACAAAACGGCAACCAACAGATTTGGAAAAAGATCTTTACCAACCCCTACAAAGATAGAGGCCCTTATATCCAAAAATATA 6815  
UID26 AAGATCAAGAATTGACAAATGGGATCTCATAAAACTGCAAAGCTTCTGTAAGGCAAAGGACACTGTGGTTAGGACAAAACGGCAACCAACAGATTTGGAAAAAGATCTTTACCAACCCCTACAAAGATAGAGGCCCTTATATCCAAAAATATA 6815  
UID44 AAGATCAAGAATTGACAAATGGGATCTCATAAAACTGCAAAGCTTCTGTAAGGCAAAGGACACTGTGGTTAGGACAAAACGGCAACCAACAGATTTGGAAAAAGATCTTTACCAACCCCTACAAAGATAGAGGCCCTTATATCCAAAAATATA 6815  
UID341 AAGATCAAGAATTGACAAATGGGATCTCATAAAACTGCAAAGCTTCTGTAAGGCAAAGGACACTGTGGTTAGGACAAAACGGCAACCAACAGATTTGGAAAAAGATCTTTACCAACCCCTACAAAGATAGAGGCCCTTATATCCAAAAATATA 6815  
UID125 AAGATCAAGAATTGACAAATGGGATCTCATAAAACTGCAAAGCTTCTGTAAGGCAAAGGACACTGTGGTTAGGACAAAACGGCAACCAACAGATTTGGAAAAAGATCTTTACCAACCCCTACAAAGATAGAGGCCCTTATATCCAAAAATATA 6815  
UID308 AAGATCAAGAATTGACAAATGGGATCTCATAAAACTGCAAAGCTTCTGTAAGGCAAAGGACACTGTGGTTAGGACAAAACGGCAACCAACAGATTTGGAAAAAGATCTTTACCAACCCCTACAAAGATAGAGGCCCTTATATCCAAAAATATA 6815  
L1-3 AAGATCAAGAATTGACAAATGGGATCTCATAAAACTGCAAAGCTTCTGTAAGGCAAAGGACACTGTGGTTAGGACAAAACGGCAACCAACAGATTTGGAAAAAGATCTTTACCAACCCCTACAAAGATAGAGGCCCTTATATCCAAAAATATA 4938  
UID225 AAGATCAAGAATTGACAAATGGGATCTCATAAAACTGCAAAGCTTCTGTAAGGCAAAGGACACTGTGGTTAGGACAAAACGGCAACCAACAGATTTGGAAAAAGATCTTTACCAACCCCTACAAAGATAGAGGCCCTTATATCCAAAAATATA 6815  
ruler .....7360.....7370.....7380.....7390.....7400.....7410.....7420.....7430.....7440.....7450.....7460.....7470.....7480.....7490.....7500

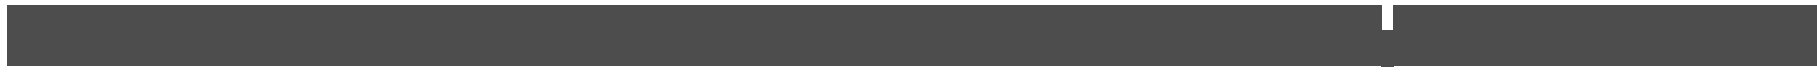

\*\*\*\*\*  
UID132 CAAAGAACTCAAGAAGTTAGACCGCAGGGAAAACAAATAACCCCTATTAATAAAATGGGGTTTCAAGCTTAAACAAAGAAATTCACAGCTGAGGAATGCCGAATGGCTGAGAAAACCTTAAAGAAATGTTCAACAATCTTTAGTCATAAGGGGAAAT 7568  
UID711 CAAAGAACTCAAGAAGTTAGACCGCAGGGAAAACAAATAACCCCTATTAATAAAATGGGGTTTCAAGCTTAAACAAAGAAATTCACAGCTGAGGAATGCCGAATGGCTGAGAAAACCTTAAAGAAATGTTCAACAATCTTTAGTCATAAGGGGAAAT 6965  
UID26 CAAAGAACTCAAGAAGTTAGACCGCAGGGAAAACAAATAACCCCTATTAATAAAATGGGGTTTCAAGCTTAAACAAAGAAATTCACAGCTGAGGAATGCCGAATGGCTGAGAAAACCTTAAAGAAATGTTCAACAATCTTTAGTCATAAGGGGAAAT 6965  
UID44 CAAAGAACTCAAGAAGTTAGACCGCAGGGAAAACAAATAACCCCTATTAATAAAATGGGGTTTCAAGCTTAAACAAAGAAATTCACAGCTGAGGAATGCCGAATGGCTGAGAAAACCTTAAAGAAATGTTCAACAATCTTTAGTCATAAGGGGAAAT 6965  
UID341 CAAAGAACTCAAGAAGTTAGACCGCAGGGAAAACAAATAACCCCTATTAATAAAATGGGGTTTCAAGCTTAAACAAAGAAATTCACAGCTGAGGAATGCCGAATGGCTGAGAAAACCTTAAAGAAATGTTCAACAATCTTTAGTCATAAGGGGAAAT 6965  
UID125 CAAAGAACTCAAGAAGTTAGACCGCAGGGAAAACAAATAACCCCTATTAATAAAATGGGGTTTCAAGCTTAAACAAAGAAATTCACAGCTGAGGAATGCCGAATGGCTGAGAAAACCTTAAAGAAATGTTCAACAATCTTTAGTCATAAGGGGAAAT 6965  
UID308 CAAAGAACTCAAGAAGTTAGACCGCAGGGAAAACAAATAACCCCTATTAATAAAATGGGGTTTCAAGCTTAAACAAAGAAATTCACAGCTGAGGAATGCCGAATGGCTGAGAAAACCTTAAAGAAATGTTCAACAATCTTTAGTCATAAGGGGAAAT 6965  
L1-3 CAAAGAACTCAAGAAGTTAGACCGCAGGGAAAACAAATAACCCCTATTAATAAAATGGGGTTTCAAGCTTAAACAAAGAAATTCACAGCTGAGGAATGCCGAATGGCTGAGAAAACCTTAAAGAAATGTTCAACAATCTTTAGTCATAAGGGGAAAT 5088  
UID225 CAAAGAACTCAAGAAGTTAGACCGCAGGGAAAACAAATAACCCCTATTAATAAAATGGGGTTTCAAGCTTAAACAAAGAAATTCACAGCTGAGGAATGCCGAATGGCTGAGAAAACCTTAAAGAAATGTTCAACAATCTTTAGTCATAAGGGGAAAT 6965  
ruler .....7510.....7520.....7530.....7540.....7550.....7560.....7570.....7580.....7590.....7600.....7610.....7620.....7630.....7640.....7650

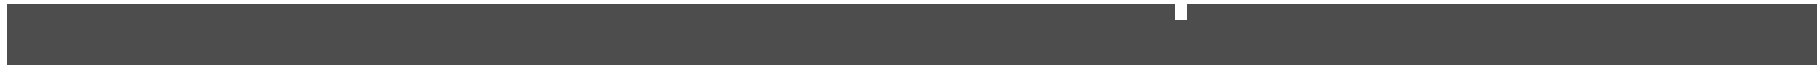

\*\*\*\*\*  
UID132 GCAAAACAAAACAAACCTGAGATTTACCTCACACCAGTCCGATTTGGCTAAGATCAAAAACTCAGGTGACAGCAGATGCTGGCGAGGTTGTGGAGAAAAGAGGAACACTCCCTCCATTTGGTGGGATTCGAGACTGGTAAAAACCATTTCTG 7718  
UID711 GCAAAACAAAACAAACCTGAGATTTACCTCACACCAGTCCGATTTGGCTAAGATCAAAAACTCAGGTGACAGCAGATGCTGGCGAGGATGTGGAGAAAAGAGGAACACTCCCTCCATTTGGTGGGATTCGAGACTGGTAAAAACCATTTCTG 7115  
UID26 GCAAAACAAAACAAACCTGAGATTTACCTCACACCAGTCCGATTTGGCTAAGATCAAAAACTCAGGTGACAGCAGATGCTGGCGAGGTTGTGGAGAAAAGAGGAACACTCCCTCCATTTGGTGGGATTCGAGACTGGTAAAAACCATTTCTG 7115  
UID44 GCAAAACAAAACAAACCTGAGATTTACCTCACACCAGTCCGATTTGGCTAAGATCAAAAACTCAGGTGACAGCAGATGCTGGCGAGGTTGTGGAGAAAAGAGGAACACTCCCTCCATTTGGTGGGATTCGAGACTGGTAAAAACCATTTCTG 7115  
UID341 GCAAAACAAAACAAACCTGAGATTTACCTCACACCAGTCCGATTTGGCTAAGATCAAAAACTCAGGTGACAGCAGATGCTGGCGAGGTTGTGGAGAAAAGAGGAACACTCCCTCCATTTGGTGGGATTCGAGACTGGTAAAAACCATTTCTG 7115  
UID125 GCAAAACAAAACAAACCTGAGATTTACCTCACACCAGTCCGATTTGGCTAAGATCAAAAACTCAGGTGACAGCAGATGCTGGCGAGGTTGTGGAGAAAAGAGGAACACTCCCTCCATTTGGTGGGATTCGAGACTGGTAAAAACCATTTCTG 7115  
UID308 GCAAAACAAAACAAACCTGAGATTTACCTCACACCAGTCCGATTTGGCTAAGATCAAAAACTCAGGTGACAGCAGATGCTGGCGAGGTTGTGGAGAAAAGAGGAACACTCCCTCCATTTGGTGGGATTCGAGACTGGTAAAAACCATTTCTG 7115  
L1-3 GCAAAACAAAACAAACCTGAGATTTACCTCACACCAGTCCGATTTGGCTAAGATCAAAAACTCAGGTGACAGCAGATGCTGGCGAGGTTGTGGAGAAAAGAGGAACACTCCCTCCATTTGGTGGGATTCGAGACTGGTAAAAACCATTTCTG 5238  
UID225 GCAAAACAAAACAAACCTGAGATTTACCTCACACCAGTCCGATTTGGCTAAGATCAAAAACTCAGGTGACAGCAGATGCTGGCGAGGTTGTGGAGAAAAGAGGAACACTCCCTCCATTTGGTGGGATTCGAGACTGGTAAAAACCATTTCTG 7115  
ruler .....7660.....7670.....7680.....7690.....7700.....7710.....7720.....7730.....7740.....7750.....7760.....7770.....7780.....7790.....7800

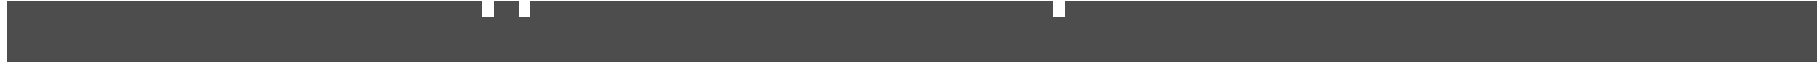

```

*****
UID132_ GAAATCAGTCTGGAGGTTCTTCAGAAAAATTGGACATTGAACTGCCTGAGGATCCAGCTATACCTCTCTTTGGGCATATACCCAAAAGATGCCTCAACATATAAAAAGAGACACGTGCTCCACTATGTTTCATCGCAGCCTTATTTATAATAGC 7868
UID711_ GAAATCAGTCTGGAGGTTCTTCAGAAAAATTGGACATTGAACTGCCTGAGGATCCAGCTATACCTCTCTTTGGGCATATAACCCAAAAGATGCCTCAACATATAAAAAGAGACACGTGCTCCACTATGTTTCATCGCAGCCTTATTTATAATAGC 7265
UID26_ GAAATCAGTCTGGAGGTTCTTCAGAAAAATTGGACATTGAACTGCCTGAGGATCCAGCTATACCTCTCTTTGGGCATATAACCCAAAAGATGCCTCAACATATAAAAAGAGACACGTGCTCCACTATGTTTCATCGCAGCCTTATTTATAATAGC 7265
UID44_ GAAATCAGTCTGGAGGTTCTTCAGAAAAATTGGACATTGAACTGCCTGAGGATCCAGCTATACCTCTCTTTGGGCATATAACCCAAAAGATGCCTCAACATATAAAAAGAGACACGTGCTCCACTATGTTTCATCGCAGCCTTATTTATAATAGC 7265
UID341_ GAAATCAGTCTGGAGGTTCTTCAGAAAAATTGGACATTGAACTGCCTGAGGATCCAGCTATACCTCTCTTTGGGCATATAACCCAAAAGATGCCTCAACATATAAAAAGAGACACGTGCTCCACTATGTTTCATCGCAGCCTTATTTATAATAGC 7265
UID125_ GAAATCAGTCTGGAGGTTCTTCAGAAAAATTGGACATTGAACTGCCTGAGGATCCAGCTATACCTCTCTTTGGGCATATAACCCAAAAGATGCCTCAACATATAAAAAGAGACACGTGCTCCACTATGTTTCATCGCAGCCTTATTTATAATAGC 7265
UID308_ GAAATCAGTCTGGAGGTTCTTCAGAAAAATTGGACATTGAACTGCCTGAGGATCCAGCTATACCTCTCTTTGGGCATATAACCCAAAAGATGCCTCAACATATAAAAAGAGACACGTGCTCCACTATGTTTCATCGCAGCCTTATTTATAATAGC 7265
L1-3_ GAAATCAGTCTGGAGGTTCTTCAGAAAAATTGGACATTGAACTGCCTGAGGATCCAGCTATACCTCTCTTTGGGCATATAACCCAAAAGATGCCTCAACATATAAAAAGAGACACGTGCTCCACTATGTTTCATCGCAGCCTTATTTATAATAGC 5388
UID225_ GAAATCAGTCTGGAGGTTCTTCAGAAAAATTGGACATTGAACTGCCTGAGGATCCAGCTATACCTCTCTTTGGGCATATAACCCAAAAGATGCCTCAACATATAAAAAGAGACACGTGCTCCACTATGTTTCATCGCAGCCTTATTTATAATAGC 7265
ruler_ .....7810.....7820.....7830.....7840.....7850.....7860.....7870.....7880.....7890.....7900.....7910.....7920.....7930.....7940.....7950

```

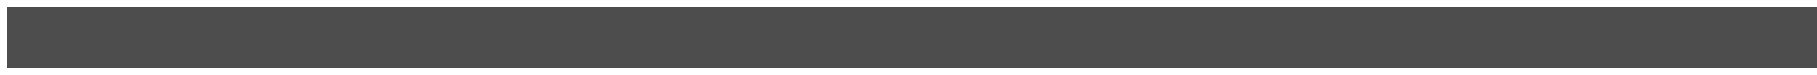

```

*****
UID132_ CAGAAAAATGGAAAGAACCAGATGCCCTTCAACAGAGGAAATGGATACAGAAAAATGGTGGTACATCTACACAAATGGAATACTACTCAGCTATCAAAAACAACGAGTTTATGAAATTCGTAGGCAAAATGGTGGAACTGGAAAAATATCATCCT 8018
UID711_ CAGAAAAATGGAAAGAACCAGATGCCCTTCAACAGAGGAAATGGATACAGAAAAATGGTGGTACATCTACACAAATGGAATACTACTCAGCTATCAAAAACAACGAGTTTATGAAATTCGTAGGCAAAATGGTGGAACTGGAAAAATATCATCCT 7415
UID26_ CAGAAAAATGGAAAGAACCAGATGCCCTTCAACAGAGGAAATGGATACAGAAAAATGGTGGTACATCTACACAAATGGAATACTACTCAGCTATCAAAAACAACGAGTTTATGAAATTCGTAGGCAAAATGGTGGAACTGGAAAAATATCATCCT 7415
UID44_ CAGAAAAATGGAAAGAACCAGATGCCCTTCAACAGAGGAAATGGATACAGAAAAATGGTGGTACATCTACACAAATGGAATACTACTCAGCTATCAAAAACAACGAGTTTATGAAATTCGTAGGCAAAATGGTGGAACTGGAAAAATATCATCCT 7415
UID341_ CAGAAAAATGGAAAGAACCAGATGCCCTTCAACAGAGGAAATGGATACAGAAAAATGGTGGTACATCTACACAAATGGAATACTACTCAGCTATCAAAAACAACGAGTTTATGAAATTCGTAGGCAAAATGGTGGAACTGGAAAAATATCATCCT 7415
UID125_ CAGAAAAATGGAAAGAACCAGATGCCCTTCAACAGAGGAAATGGATACAGAAAAATGGTGGTACATCTACACAAATGGAATACTACTCAGCTATCAAAAACAACGAGTTTATGAAATTCGTAGGCAAAATGGTGGAACTGGAAAAATATCATCCT 7415
UID308_ CAGAAAAATGGAAAGAACCAGATGCCCTTCAACAGAGGAAATGGATACAGAAAAATGGTGGTACATCTACACAAATGGAATACTACTCAGCTATCAAAAACAACGAGTTTATGAAATTCGTAGGCAAAATGGTGGAACTGGAAAAATATCATCCT 7415
L1-3_ CAGAAAAATGGAAAGAACCAGATGCCCTTCAACAGAGGAAATGGATACAGAAAAATGGTGGTACATCTACACAAATGGAATACTACTCAGCTATCAAAAACAACGAGTTTATGAAATTCGTAGGCAAAATGGTGGAACTGGAAAAATATCATCCT 5538
UID225_ CAGAAAAATGGAAAGAACCAGATGCCCTTCAACAGAGGAAATGGATACAGAAAAATGGTGGTACATCTACACAAATGGAATACTACTCAGCTATCAAAAACAACGAGTTTATGAAATTCGTAGGCAAAATGGTGGAACTGGAAAAATATCATCCT 7415
ruler_ .....7960.....7970.....7980.....7990.....8000.....8010.....8020.....8030.....8040.....8050.....8060.....8070.....8080.....8090.....8100

```

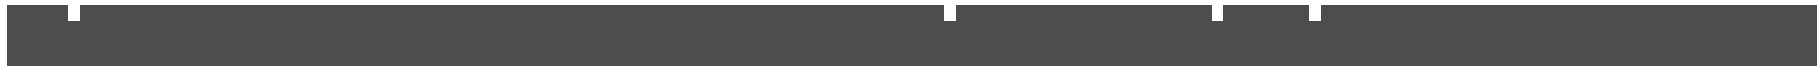

```

*****
UID132_ GAGTGAACAAACCAATCACAGAAAGACATACATGGTATGCACCTCATTGATAAGTGGCTATTAGCCCAAAATGCTTGAATTAACCTAGATCCCTAGAACAAAAGAACTCAAGACGGATGATCAAAAATGTGAATGCTTCACTCCCTCTTTTA 8168
UID711_ GAGTGAACAAACCAATCACAGAAAGACATACATGGTATGCACCTCATTGATAAGTGGCTATTAGCCCAAAATGCTTGAATTAACCTAGATCCCTAGAACAAAAGAACTCAAGACGGATGATCAAAAATGTGAATGCTTCACTCCCTCTTTTA 7565
UID26_ GAGTGAACAAACCAATCACAGAAAGACATACATGGTATGCACCTCATTGATAAGTGGCTATTAGCCCAAAATGCTTGAATTAACCTAGATCCCTAGAACAAAAGAACTCAAGACGGATGATCAAAAATGTGAATGCTTCACTCCCTCTTTTA 7565
UID44_ GAGTGAACAAACCAATCACAGAAAGACATACATGGTATGCACCTCATTGATAAGTGGCTATTAGCCCAAAATGCTTGAATTAACCTAGATCCCTAGAACAAAAGAACTCAAGACGGATGATCAAAAATGTGAATGCTTCACTCCCTCTTTTA 7565
UID341_ GAGTGAACAAACCAATCACAGAAAGACATACATGGTATGCACCTCATTGATAAGTGGCTATTAGCCCAAAATGCTTGAATTAACCTAGATCCCTAGAACAAAAGAACTCAAGACGGATGATCAAAAATGTGAATGCTTCACTCCCTCTTTTA 7565
UID125_ GAGTGAACAAACCAATCACAGAAAGACATACATGGTATGCACCTCATTGATAAGTGGCTATTAGCCCAAAATGCTTGAATTAACCTAGATCCCTAGAACAAAAGAACTCAAGACGGATGATCAAAAATGTGAATGCTTCACTCCCTCTTTTA 7565
UID308_ AAGTGAACAAACCAATCACAGAAAGACATACATGGTATGCACCTCATTGATAAGTGGCTATTAGCCCAAAATGCTTGAATTAACCTAGATCCCTAGAACAAAAGAACTCAAGACGGATGATCAAAAATGTGAATGCTTCACTCCCTCTTTTA 7565
L1-3_ GAGTGAACAAACCAATCACAGAAAGACATACATGGTATGCACCTCATTGATAAGTGGCTATTAGCCCAAAATGCTTGAATTAACCTAGATCCCTAGAACAAAAGAACTCAAGACGGATGATCAAAAATGTGAATGCTTCACTCCCTCTTTTA 5688
UID225_ GAGTGAACAAACCAATCACAGAAAGACATACATGGTATGCACCTCATTGATAAGTGGCTATTAGCCCAAAATGCTTGAATTAACCTAGATCCCTAGAACAAAAGAACTCAAGACGGATGATCAAAAATGTGAATGCTTCACTCCCTCTTTTA 7565
ruler_ .....8110.....8120.....8130.....8140.....8150.....8160.....8170.....8180.....8190.....8200.....8210.....8220.....8230.....8240.....8250

```

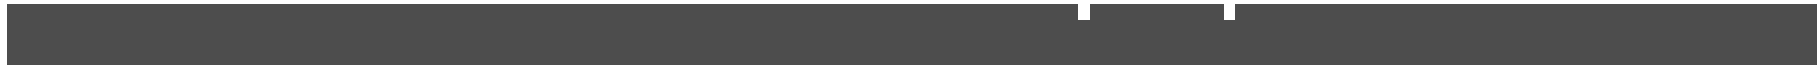

```

*****
UID132_ AATGAGGAAAAAGAAATACCCCTTGGCAGGGAAGGGAGAGGCAAAGATTTAAAAAGAGACTGAAGGAACACCCATTAGAGCCTGTCCCACATTTGGCCCATACATATACAGCCACCCAAATGGACTAGATGGATGAAGCAAAGAAAGTGCAG 8318
UID711_ AATGAGGAAAAAGAAATACCCCTTGGCAGGGAAGGGAGAGGCAAAGATTTAAAAAGAGACTGAAGGAACACCCATTAGAGCCTGTCCCACATTTGGCCCATACATATACAGCCACCCAAATGGACTAGATGGATGAAGCAAAGAAAGTGCAG 7715
UID26_ AATGAGGAAAAAGAAATACCCCTTGGCAGGGAAGGGAGAGGCAAAGATTTAAAAAGAGACTGAAGGAACACCCATTAGAGCCTGTCCCACATTTGGCCCATACATATACAGCCACCCAAATGGACTAGATGGATGAAGCAAAGAAAGTGCAG 7715
UID44_ AATGAGGAAAAAGAAATACCCCTTGGCAGGGAAGGGAGAGGCAAAGATTTAAAAAGAGACTGAAGGAACACCCATTAGAGCCTGTCCCACATTTGGCCCATACATATACAGCCACCCAAATGGACTAGATGGATGAAGCAAAGAAAGTGCAG 7715
UID341_ AATGAGGAAAAAGAAATACCCCTTGGCAGGGAAGGGAGAGGCAAAGATTTAAAAAGAGACTGAAGGAACACCCATTAGAGCCTGTCCCACATTTGGCCCATACATATACAGCCACCCAAATGGACTAGATGGATGAAGCAAAGAAAGTGCAG 7715
UID125_ AATGAGGAAAAAGAAATACCCCTTGGCAGGGAAGGGAGAGGCAAAGATTTAAAAAGAGACTGAAGGAACACCCATTAGAGCCTGTCCCACATTTGGCCCATACATATACAGCCACCCAAATGGACTAGATGGATGAAGCAAAGAAAGTGCAG 7715
UID308_ AATGAGGAAAAAGAAATACCCCTTGGCAGGGAAGGGAGAGGCAAAGATTTAAAAAGAGACTGAAGGAACACCCATTAGAGCCTGTCCCACATTTGGCCCATACATATACAGCCACCCAAATGGACTAGATGGATGAAGCAAAGAAAGTGCAG 7715
L1-3_ AATGAGGAAAAAGAAATACCCCTTGGCAGGGAAGGGAGAGGCAAAGATTTAAAAAGAGACTGAAGGAACACCCATTAGAGCCTGTCCCACATTTGGCCCATACATATACAGCCACCCAAATGGACTAGATGGATGAAGCAAAGAAAGTGCAG 5838
UID225_ AATGAGGAAAAAGAAATACCCCTTGGCAGGGAAGGGAGAGGCAAAGATTTAAAAAGAGACTGAAGGAACACCCATTAGAGCCTGTCCCACATTTGGCCCATACATATACAGCCACCCAAATGGACTAGATGGATGAAGCAAAGAAAGTGCAG 7715
ruler_ .....8260.....8270.....8280.....8290.....8300.....8310.....8320.....8330.....8340.....8350.....8360.....8370.....8380.....8390.....8400

```

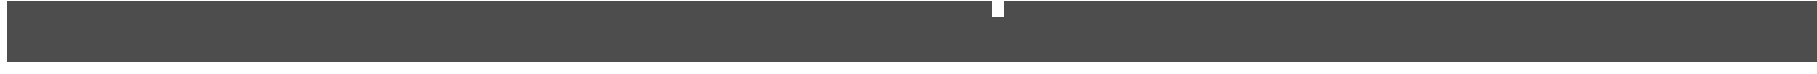

Supplement: nar_gkm1045_5.pdf [file nar_gkm1045_5.pdf]
