# Supplementary material for: Functional endogenous LINE-1 retrotransposons are expressed and mobilized in rat chloroleukemia cells
Source: PubMed Central journal article supplement — Nucleic Acids Res. 2007 Dec 10;36(2):648–65. doi: 10.1093/nar/gkm1045 (PMC2241872; doi:10.1093/nar/gkm1045), 2007-12-10

```

*****
UID711 MARGKRRNPSNRNQDCMPSSSEPNSPAKTNMEYPNTPEKQDLVSKSYLIMMLEDFKKDMNTLRETOEIINKQVEAYREEWOKSLKEFQENTIKOMKELKMEIEAIKKEHMETTLDIENQKK 120
UID308 MARGKRRNPSNRNQDCMPSSSEPNSPAKTNMEYPNTPEKQDLVSKSYLIMMLEDFKKDMNTLRETOEIINKQVEAYREEWOKSLKEFQENTIKOMKELKMEIEAIKKEHMETTLDIENQKK 120
UID132 MARGKRRNPSNRNQDCMPSSSEPNSPAKTNMEYPNTPEKQDLVSKSYLIMMLEDFKKDMNTLRETOEIINKQVEAYREEWOKSLKEFQENTIKOMKELKMEIEAIKKEHMETTLDIENQKK 120
UID125 MARGKRRNPSNRNQDCMPSSSEPNSPAKTNMEYPNTPEKQDLVSKSYLIMMLEDFKKDMNTLRETOEIINKQVEAYREEWOKSLKEFQENTIKOMKELKMEIEAIKKEHMETTLDIENQKK 120
UID26 MARGKRRNPSNRNQDCMPSSSEPNSPAKTNMEYPNTPEKQDLVSKSYLIMMLEDFKKDMNTLRETOEIINKQVEAYREEWOKSLKEFQENTIKOMKELKMEIEAIKKEHMETTLDIENQKK 120
UID44 MARGKRRNPSNRNQDCMPSSSEPNSPAKTNMEYPNTPEKQDLVSKSYLIMMLEDFKKDMNTLRETOEIINKQVEAYREEWOKSLKEFQENTIKOMKELKMEIEAIKKEHMETTLDIENQKK 120
L1-3 MARGKRRNPSNRNQDCMPSSSEPNSPAKTNMEYPNTPEKQDLVSKSYLIMMLEDFKKDMNTLRETOEIINKQVEAYREEWOKSLKEFQENTIKOMKELKMEIEAIKKEHMETTLDIENQKK 120
UID225 MARGKRRNPSNRNQDCMPSSSEPNSPAKTNMEYPNTPEKQDLVSKSYLIMMLEDFKKDMNTLRETOEIINKQVEAYREEWOKSLKEFQENTIKOMKELKMEIEAIKKEHMETTLDIENQKK 120
UID341 MARGKRRNPSNRNQDCMPSSSEPNSPAKTNMEYPNTPEKQDLVSKSYLIMMLEDFKKDMNTLRETOEIINKQVEAYREEWOKSLKEFQENTIKOMKELKMEIEAIKKEHMETTLDIENQKK 120
ruler 1.....10.....20.....30.....40.....50.....60.....70.....80.....90.....100.....110.....120

```

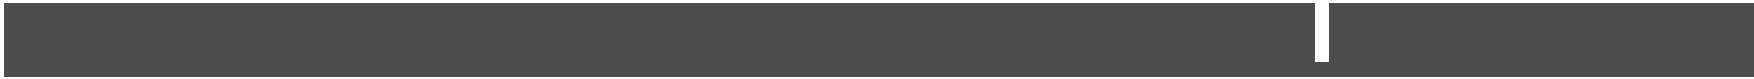

```

*****
UID711 RQGAVDTSFTNRIQEMEERISGAEDSIEIIDSTVKDNVKKRLLVQNIQEIQDSMRRSNLRIIGIEESDQLKGPVNIIFNKIIEENFPNLKKEIPIGIEAYRTPNRLDQKRNTSRHII 240
UID308 RQGAVDTSFTNRIQEMEERISGAEDSIEIIDSTVKDNVKKRLLVQNIQEIQDSMRRSNLRIIGIEESDQLKGPVNIIFNKIIEENFPNLKKEIPIGIEAYRTPNRLDQKRNTSRHII 240
UID132 RQGAVDTSFTNRIQEMEERISGAEDSIEIIDSTVKDNVKKRLLVQNIQEIQDSMRRSNLRIIGIEESDQLKGPVNIIFNKIIEENFPNLKKEIPIGIEAYRTPNRLDQKRNTSRHII 240
UID125 RQGAVDTSFTNRIQEMEERISGAEDSIEIIDSTVKDNVKKRLLVQNIQEIQDSMRRSNLRIIGIEESDQLKGPVNIIFNKIIEENFPNLKKEIPIGIEAYRTPNRLDQKRNTSRHII 240
UID26 RQGAVDTSFTNRIQEMEERISGAEDSIEIIDSTVKDNVKKRLLVQNIQEIQDSMRRSNLRIIGIEESDQLKGPVNIIFNKIIEENFPNLKKEIPIGIEAYRTPNRLDQKRNTSRHII 240
UID44 RQGAVDTSFTNRIQEMEERISGAEDSIEIIDSTVKDNVKKRLLVQNIQEIQDSMRRSNLRIIGIEESDQLKGPVNIIFNKIIEENFPNLKKEIPIGIEAYRTPNRLDQKRNTSRHII 240
L1-3 RQGAVDTSFTNRIQEMEERISGAEDSIEIIDSTVKDNVKKRLLVQNIQEIQDSMRRSNLRIIGIEESDQLKGPVNIIFNKIIEENFPNLKKEIPIGIEAYRTPNRLDQKRNTSRHII 240
UID225 RQGAVDTSFTNRIQEMEERISGAEDSIEIIDSTVKDNVKKRLLVQNIQEIQDSMRRSNLRIIGIEESDQLKGPVNIIFNKIIEENFPNLKKEIPIGIEAYRTPNRLDQKRNTSRHII 240
UID341 RQGAVDTSFTNRIQEMEERISGAEDSIEIIDSTVKDNVKKRLLVQNIQEIQDSMRRSNLRIIGIEESDQLKGPVNIIFNKIIEENFPNLKKEIPIGIEAYRTPNRLDQKRNTSRHII 240
ruler .....130.....140.....150.....160.....170.....180.....190.....200.....210.....220.....230.....240

```

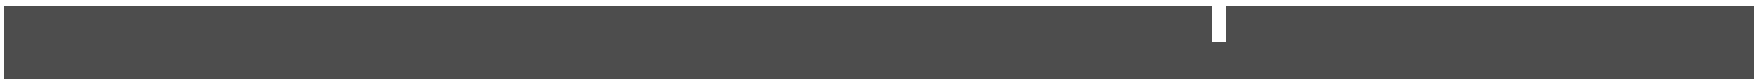

```

*****
UID711 VKTPNAQNKERILKAVREKGVVTKGRPIRITPDFSPETMKARRSWTDVITLREHKCQPRLLYPAKLSINIDGETKIFHDKTKFTQYLSNTPALQRIINGKAQHKEASYTLEARN 357
UID308 VKTPNAQNKERILKAVREKGVVTKGRPIRITPDFSPETMKARRSWTDVITLREHKCQPRLLYPAKLSINIDGETKIFHDKTKFTQYLSNTPALQRIINGKAQHKEASYTLEARN 357
UID132 VKTPNAQNKERILKAVREKGVVTKGRPIRITPDFSPETMKARRSWTDVITLREHKCQPRLLYPAKLSINIDGETKIFHDKTKFTQYLSNTPALQRIINGKAQHKEASYTLEARN 357
UID125 VKTPNAQNKERILKAVREKGVVTKGRPIRITPDFSPETMKARRSWTDVITLREHKCQPRLLYPAKLSINIDGETKIFHDKTKFTQYLSNTPALQRIINGKAQHKEASYTLEARN 357
UID26 VKTPNAQNKERILKAVREKGVVTKGRPIRITPDFSPETMKARRSWTDVITLREHKCQPRLLYPAKLSINIDGETKIFHDKTKFTQYLSNTPALQRIINGKAQHKEASYTLEARN 357
UID44 VKTPNAQNKERILKAVREKGVVTKGRPIRITPDFSPETMKARRSWTDVITLREHKCQPRLLYPAKLSINIDGETKIFHDKTKFTQYLSNTPALQRIINGKAQHKEASYTLEARN 357
L1-3 VKTPNAQNKERILKAVREKGVVTKGRPIRITPDFSPETMKARRSWTDVITLREHKCQPRLLYPAKLSINIDGETKIFHDKTKFTQYLSNTPALQRIINGKAQHKEASYTLEARN 357
UID225 VKTPNAQNKERILKAVREKGVVTKGRPIRITPDFSPETMKARRSWTDVITLREHKCQPRLLYPAKLSINIDGETKIFHDKTKFTQYLSNTPALQRIINGKAQHKEASYTLEARN 357
UID341 VKTPNAQNKERILKAVREKGVVTKGRPIRITPDFSPETMKARRSWTDVITLREHKCQPRLLYPAKLSINIDGETKIFHDKTKFTQYLSNTPALQRIINGKAQHKEASYTLEARN 357
ruler .....250.....260.....270.....280.....290.....300.....310.....320.....330.....340.....350.....

```

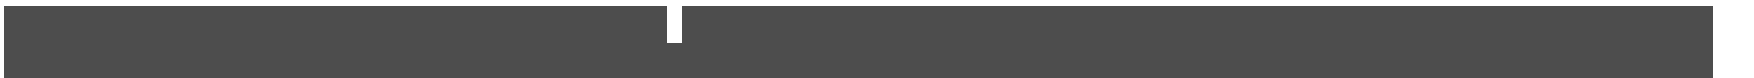

Supplement: nar_gkm1045_6.pdf [file nar_gkm1045_6.pdf]
