# Supplementary material for: Functional endogenous LINE-1 retrotransposons are expressed and mobilized in rat chloroleukemia cells
Source: PubMed Central journal article supplement — Nucleic Acids Res. 2007 Dec 10;36(2):648–65. doi: 10.1093/nar/gkm1045 (PMC2241872; doi:10.1093/nar/gkm1045), 2007-12-10
Supplement: nar_gkm1045_8.pdf [file nar_gkm1045_8.pdf]

|       |   |                                                                                 |    |
|-------|---|---------------------------------------------------------------------------------|----|
| L1-17 | 1 | TCGTCTTGGCAACAAAACAAA-GAGAATGAAAGCACACAAACATAACATCACATCCAAAT                    | 59 |
| L1-21 | 1 | TCGTCTTGGCAACAAAACAAA-GAGAATGAAAGCACACAAACATAACCTCACATCCAAAT                    | 59 |
| L1-8  | 1 | TCGTCTTGGCAACAAAACAAA-GAGAATGAAAGCACACAAACATAACCGCACATCCAAAT                    | 59 |
| L1-13 | 1 | TCGTCTTGGCAACAAAACAAA-GAGAATGAAAGCACACAAACATAACCTCACATCCAAAT                    | 59 |
| L1-12 | 1 | TCGTCTTGGCAACAAAACAAA-GAGAATGAAAGCACACAAACATAACCTCACATCCAAAT                    | 59 |
| L1-23 | 1 | TCGTCTTGGCAACAAAACAAA-GAGAATGAAAGCACACAAACATAACCTCACATCCAAAT                    | 59 |
| L1-22 | 1 | TCGTCTTGGCAACAAAACAAA-GAGAATGAAAGCACACAAACATAACCTCACTTCCAAAT                    | 59 |
| L1-10 | 1 | TCGTCTTGGCAACAAAACAAA-GAGAATGAAAGCACACAAACATAACCTCACATCCAAAT                    | 59 |
| L1-19 | 1 | TCGTCTTGGCAACAAAACAAA-GAGAA-GAAAGCACACAAACATAACCTCACATCCAAAT                    | 58 |
| L1-3  | 1 | TCGTCTTGGCAACAAA <u>AAAA</u> <u>AAAA</u> GAGAATGAAAGCACACAAACATAACCTCACATCCAAAT | 60 |
