# Supplementary figures and images for: Functional endogenous LINE-1 retrotransposons are expressed and mobilized in rat chloroleukemia cells
Source: PubMed Central journal article supplement — Nucleic Acids Res. 2007 Dec 10;36(2):648–65. doi: 10.1093/nar/gkm1045 (PMC2241872; doi:10.1093/nar/gkm1045), 2007-12-10

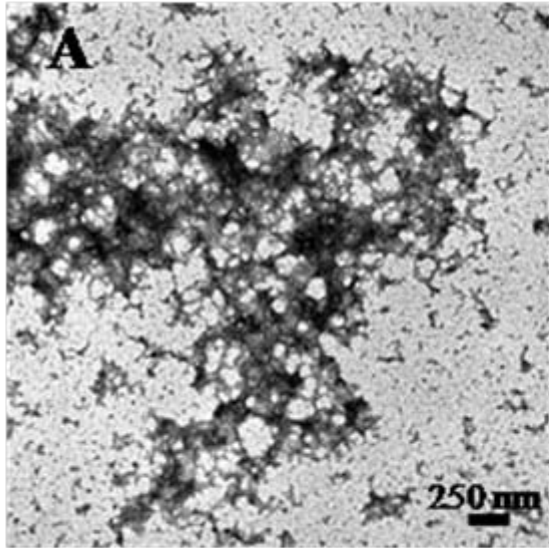

**A**  
ORF1p  
(in buffer +150mM NaCl)

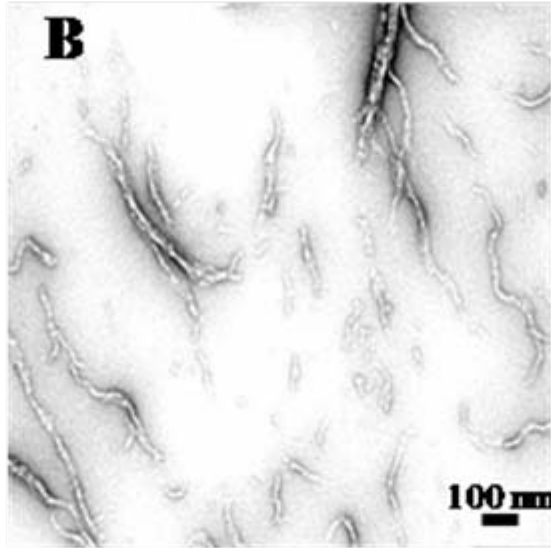

**B**  
ORF1p $\Delta$ 1-143  
(in buffer without salt)

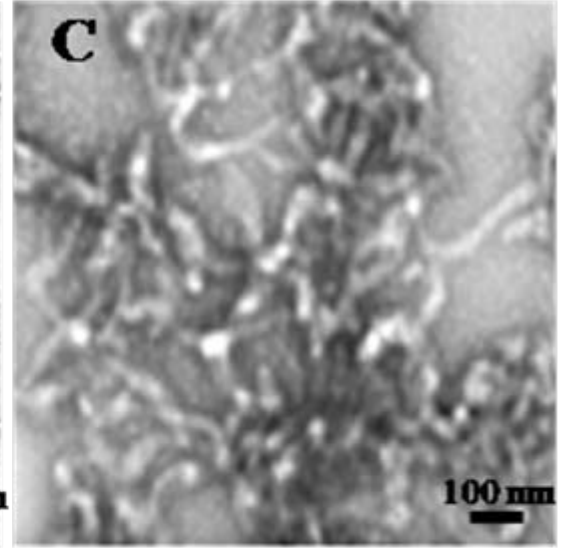

**C**  
ORF1p $\Delta$ 1-143  
(in buffer +150mM NaCl)

Supplement: nar_gkm1045_10.pdf [file nar_gkm1045_10.pdf]

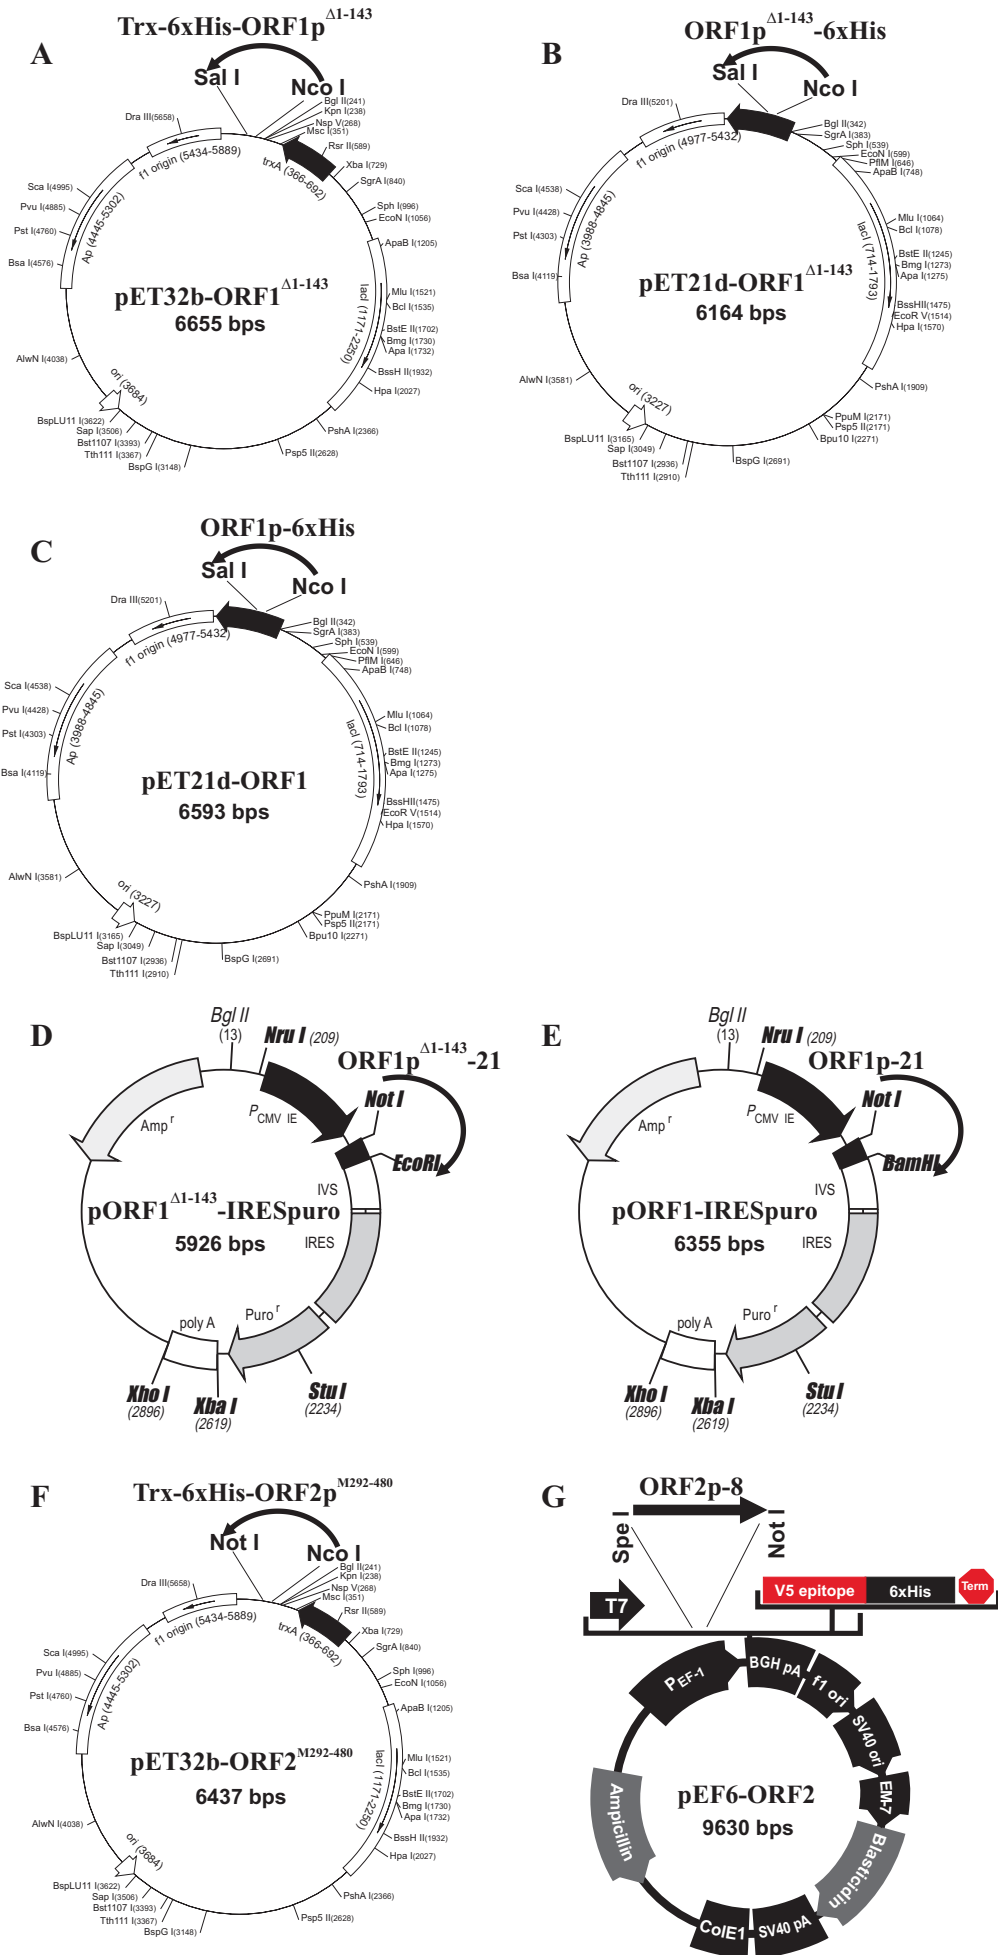

Supplement: nar_gkm1045_9.pdf [file nar_gkm1045_9.pdf]
